# Supplementary material for: Effect of Ramadan Fasting on Weight and Body Composition in Healthy Non-Athlete Adults: A Systematic Review and Meta-Analysis
Source: Nutrients. 2019 Feb 24;11(2):478. doi: 10.3390/nu11020478 (PMC6412279; doi:10.3390/nu11020478)
Supplement: Supplementary file 1 [file nutrients-11-00478-s001.pdf]

**Supplementary materials**

**Effect of Ramadan fasting on weight and body composition in healthy adult non-athletes: a systematic review and meta-analysis**

Hamish A. Fernando<sup>1</sup>, Jessica Zibellini<sup>1</sup>, Rebecca A. Harris<sup>1</sup>, Radhika V. Seimon<sup>1\*</sup>, Amanda Sainsbury<sup>1\*#</sup>

<sup>1</sup>The University of Sydney, The Boden Institute of Obesity, Nutrition, Exercise & Eating Disorders, Faculty of Medicine and Health, Charles Perkins Centre, NSW 2006, Australia

#Equal contribution

**\*Corresponding author: Amanda Salis (nee Sainsbury)**

Email: amanda.salis@sydney.edu.au

Phone: +61 423 777 801

**Table S1a.** Publication details and characteristics of participants of all included studies.

| Publication              | Sample size |    |       | Age (years) | Pre-R BMI (kg/m <sup>2</sup> ) | Year of study | Location of study           | Fasting duration (hours) | Timing of measurements (relative to the Ramadan fast) |                |               |
|--------------------------|-------------|----|-------|-------------|--------------------------------|---------------|-----------------------------|--------------------------|-------------------------------------------------------|----------------|---------------|
|                          | M           | F  | Total |             |                                |               |                             |                          | Pre-R                                                 | Post-R         | Follow-up     |
| Fedail 1982 (28)         | 20          | 4  | 24    | 21-40       |                                |               | Bristol, UK/Khartoum, Sudan | 16                       | Day 1                                                 | Last day       |               |
| Husain 1987 [M] (29)     | 12          |    | 21    | 20-45       |                                |               | Malaysia                    | 14.5                     | 1-7 days before                                       | Just after     |               |
| Husain 1987 [F] (29)     |             | 9  |       |             |                                |               |                             |                          |                                                       |                |               |
| Takruri 1989 [Ow] (11)   | 50          | 25 | 75    | 19-59       |                                |               | Jordan                      | 16.5                     | 1 day before                                          | Day 29         |               |
| Takruri 1989 [Nw] (11)   | 24          | 14 | 38    |             |                                |               |                             |                          |                                                       |                |               |
| Azizi 1992 (30)          | 9           |    | 9     | 23-54       |                                | 1983          | Tehran, Iran                | 17                       | 7 days before                                         | Day 29         | 28 days after |
| Sweileh 1992 (31)        | 7           | 1  | 8     | 22-35       |                                |               | USA                         |                          | 7 days before                                         | Day 21-28      |               |
| Maislos 1993 (32)        | 16          | 8  | 24    | 18-45       |                                |               | Israel                      |                          |                                                       | Day 26, 27     | 28 days after |
| El-Ati 1995 (33)         |             | 16 | 16    | 25-39       | 22.7±1.2                       |               | Tunisia                     |                          | 2 days before                                         | Day 28         | 28 days after |
| Adlouni 1998 (34)        | 32          |    | 32    | 25-50       |                                |               | Casablanca, Morocco         |                          | 7 days before                                         | Day 29         | 28 days after |
| Bilto 1998 (35)          | 34          | 9  | 43    | 20-48       |                                | 1997          | Jordan                      | 11*                      | 1-7 days before                                       | Day 21-28      |               |
| Finch 1998 (36)          | 15          | 26 | 41    | 19-63       |                                | 1996          | Reading, UK                 | 10.5*                    | Just before                                           | Just after     | 28 days after |
| Kayikcioglu 1998 (37)    | 32          |    | 32    | 22.3±2.9    |                                | 1998          | Turkey                      |                          | Beginning of Ramadan                                  | End of Ramadan |               |
| Fakhrzadeh 2003 [M] (38) | 50          |    | 91    | 20.8±3.1    | 21.8±2.6                       | 2000          | Tehran, Iran                | 11.5                     | 7 days before                                         | Day 28         |               |
| Fakhrzadeh 2003 [F] (38) |             | 41 |       |             | 24.0±4.5                       |               |                             |                          |                                                       |                |               |
| Kassab 2003 [N-Ob] (12)  | 26          |    | 44    | 18-45       | 22.5±2.0                       |               | Bahrain                     | 13                       | Day 1                                                 | Day 28         | 14 days after |
| Kassab 2003 [Ob] (12)    |             | 18 |       |             | 33.1±0.4                       |               |                             |                          |                                                       |                |               |
| Kassab 2004 (39)         |             | 46 | 46    | 18-45       | 25.3±4.8                       |               | Bahrain                     | 13*                      | Day 1                                                 | Day 28         | 14 days after |
| Rahman 2004 (40)         | 20          |    | 20    | 38.3±4.1    | 24.2±2.5                       | 1998-1999     | Bangladesh                  | 12                       | 1 day before                                          | Day 26         | 28 days after |
| Saleh 2004 (18)          | 15          | 88 | 103   | 15-52       | 39.7±6.4                       | 2002-2003     | Egypt                       | 10.5                     | Before onset                                          | End            | 28 days after |
| Yucel 2004 [M] (41)      | 21          |    | 38    | 20-45       | 25.2±4.2                       | 2002          | Turkey                      | 13                       | Just before                                           | Just after     |               |
| Yucel 2004 [F] (41)      |             | 17 |       |             | 24.5±4.7                       |               |                             |                          |                                                       |                |               |

| Publication                | Sample size |    |     | Age (years) | Pre-R BMI (kg/m <sup>2</sup> ) | Year of study | Location of study      | Fasting duration (hours) | Timing of measurements (relative to the Ramadan fast) |                        |               |
|----------------------------|-------------|----|-----|-------------|--------------------------------|---------------|------------------------|--------------------------|-------------------------------------------------------|------------------------|---------------|
| Aksungar 2005 (42)         | 12          | 12 | 24  | 21-35       |                                |               | Istanbul, Turkey       | 15                       | 7 days before                                         | Day 21                 | 20 days after |
| Al-Numair 2006 (43)        | 45          |    | 45  | 30-45       |                                | 2004          | Buraidah, Saudi Arabia |                          | 1 day before                                          | Day 28                 |               |
| Dewanti 2006 (22)          | 37          |    |     | 17-62       | 24.2±3.2                       | 2004          | Indonesia              | 12*                      | 3 days before                                         | Day 21                 |               |
| Lamine 2006 (44)           | 9           | 21 | 30  | 23.7±2.2    |                                | 2003          | Tunisia                | 12                       | 21 days before                                        | Day 21-28              | 21 days after |
| Subhan 2006 (45)           | 46          |    | 46  | 16-41       | 23.5±3.9                       | 2001          | Pakistan               | 10*                      | Pre-Ramadan                                           | Ramadan                |               |
| Ziaee 2006 [M] (23)        |             | 39 | 80  | 18-29       | 23.1±6.0                       | 2002          | Iran                   | 10.5*                    | 3 days before                                         | Day 26                 |               |
| Ziaee 2006 [F] (23)        | 41          |    |     |             | 21.3±1.8                       |               |                        |                          |                                                       |                        |               |
| Al-Hourani 2007 (46)       |             |    | 47  | 18-29       | 22.2±3.1                       | 2004          | Jordan                 | 12                       | 7 days before                                         | Day 25-28              |               |
| Mansi 2007 (47)            | 42          |    | 42  | 21.3±1.6    |                                | 2006          | Jordan                 | 12*                      | 1 day before                                          | Day 21-28              |               |
| Moosavi 2007 [M] (48)      | 77          |    | 117 | 26.2-29.6   |                                | 1999-2000     | Tehran, Iran           | 10*                      | 10 days before                                        | Second half of Ramadan |               |
| Moosavi 2007 [F] (48)      |             | 40 |     |             |                                |               |                        |                          |                                                       |                        |               |
| Souissi 2007 (49)          | 20          |    | 20  | 22.6±1.3    |                                | 2005          | Tunis, Tunisia         | 16                       | 7 days before                                         | Day 21-28              | 14 days after |
| Haouari 2008 (19)          | 36          |    | 36  | 24±1.6      |                                |               | Tunis, Tunisia         | 12                       | 7 days before                                         | Day 21                 |               |
| Ibrahim 2008 (50)          | 9           | 5  | 14  | 25-58       | 24.6±3.8                       |               | UAE                    | 16                       | 2 days before                                         | Day 28                 |               |
| Stannard 2008 (51)         | 8           |    | 8   | 21-41       |                                | 2000          | Sydney, Australia      | 14.5                     | 1-7 days before                                       | Day 25-28              |               |
| Lamri-Senhadj 2009 [M](20) | 24          |    | 46  | 24±3        |                                |               | Algeria                | 14*                      | 15 Days before                                        | Day 28                 | 15 days after |
| Lamri-Senhadj 2009[F](20)  |             | 22 |     |             |                                |               |                        |                          |                                                       |                        |               |
| Pathan 2010 (52)           | 30          |    | 30  | 25-35       |                                |               | Maharashtra, India     | 12                       | 1 day before                                          | 1 day after            |               |
| Assadi 2011 (53)           | 58          |    | 58  | 40.7±7.1    |                                |               | Iran                   |                          | Day 1                                                 | Last day               |               |
| Trabelsi 2011 (24)         | 10          |    | 10  | 26.6±3      | 24.6±1.4                       | 2010          | Tunisia                | 15                       | 3 days before                                         | Day 29                 | 21 days after |
| Ünalacak 2011 [Ob] (13)    | 10          |    | 20  | 27.4±5.2    | 28.1±2.1                       | 2007          | Turkey                 | 12*                      | Pre-Ramadan                                           | Post-Ramadan           |               |
| Ünalacak 2011 [Nw] (13)    | 10          |    |     |             | 23.7±1.4                       |               |                        |                          |                                                       |                        |               |
| Faris 2012a (54)           | 21          | 29 | 50  | 18-51       | 26.3±5.0                       | 2009          | Rusaifa, Jordan        | 14.5                     | 7 days before                                         | Day 21                 | 28 days after |
| Faris 2012b (55)           | 23          | 27 | 50  | 18-51       | 26.4±5.0                       |               | Rusaifa, Jordan        | 14.5                     | 7 days before                                         | Day 21                 | 28 days after |
| Hajek 2012 (56)            |             |    | 87  | 34          |                                | 2010          | East London, UK        | 16                       | 1-7 days before                                       | 1-7 days after         | 28 days after |

| Publication               | Sample size |    |     | Age (years) | Pre-R BMI (kg/m <sup>2</sup> ) | Year of study | Location of study    | Fasting duration (hours) | Timing of measurements (relative to the Ramadan fast) |                |                      |
|---------------------------|-------------|----|-----|-------------|--------------------------------|---------------|----------------------|--------------------------|-------------------------------------------------------|----------------|----------------------|
| Khattak 2012 [M, Nw] (14) | 10          |    | 20  |             | 21.8±1.6                       |               | Malaysia             | 12*                      | Day1                                                  | Day 21         |                      |
| Khattak 2012 [M, Ob] (14) |             |    |     |             | 32.5±5.1                       |               |                      |                          |                                                       |                |                      |
| Khattak 2012 [F, Nw] (14) |             | 10 |     |             | 23.9±6.6                       |               |                      |                          |                                                       |                |                      |
| Khattak 2012 [F, Ob] (14) |             |    |     |             | 34.5±2.4                       |               |                      |                          |                                                       |                |                      |
| Shehab 2012 [M] (57)      | 42          |    | 60  | 38.7±10.5   | 28.1±4.4                       |               | UAE                  |                          | Day 1                                                 | Day 28         | 28 days after        |
| Shehab 2012 [F] (57)      |             | 18 |     |             | 27.2±5.5                       |               |                      |                          |                                                       |                |                      |
| Racinais 2012 (58)        | 11          |    | 11  | 31±3        |                                | 2007          | Qatar                | 11.5                     | 7 days before                                         | Day 21-28      | Approx 30 days after |
| Agoumi 2013 (59)          | 22          | 33 | 55  | 18-70       | 29.5±6.0                       | 2012          | Barcelona, Spain     | 14*                      | 10 days before                                        | Day 28         |                      |
| Develioglu 2013 (60)      | 35          |    | 35  | 20-59       | 25.5±3.5                       | 2012          | Turkey               | 12*                      | 7 days before                                         | Day 21-28      |                      |
| Haouari-Oukerro 2013 (61) | 38          |    | 38  | 18-23       | 23.3±0.3                       | 2005          | Tunisia              | 12                       | Just before                                           | Day 27         |                      |
| Norouzy 2013[M,18-35](62) | 31          |    | 240 | 18-35       | 26.4±0.5                       | 2008          | Mashhad, Iran        | 14                       | 1-7 days before                                       | 1-7 days after |                      |
| Norouzy 2013[F,18-35](62) |             | 51 |     |             | 24.1±0.6                       |               |                      |                          |                                                       |                |                      |
| Norouzy 2013[M,36-70](62) | 127         |    |     | 36-70       | 26.8±0.3                       |               |                      |                          |                                                       |                |                      |
| Norouzy 2013[F,36-70](62) |             | 31 |     |             | 27.7±0.8                       |               |                      |                          |                                                       |                |                      |
| Rohin 2013 [Nw] (15)      |             |    | 46  | 25-40       |                                | 2012          | Gong Badak, Malaysia | 12*                      | 7 days before                                         | Day 14-21      | 28 days after        |
| Rohin 2013 [Ow] (15)      |             |    |     |             |                                |               |                      |                          |                                                       |                |                      |
| Rohin 2013 [Ob] (15)      |             |    |     |             |                                |               |                      |                          |                                                       |                |                      |
| Sayedda 2013 (63)         | 20          |    | 20  | 19-32       |                                | 2012          | Uttar Pradesh, India | 15                       | 2 days before                                         | Day 29         |                      |
| Akaberi 2014 (64)         |             |    | 43  | 29.7±4.5    |                                | 2011          | Iran                 | 16                       | 1 day before                                          | 1 day after    |                      |
| Feizollahzadeh 2014 (65)  | 7           |    | 7   | 30-70       | 27.98±1.38                     | 2012          | Iran                 | 14.5                     | Pre Ramadan                                           | Post Ramadan   |                      |
| Cansel 2014 (66)          | 24          | 16 | 40  | 29.3±5.9    | 22.6±11.3                      | 2010          | Turkey               | 17                       | Before onset                                          | After          |                      |
| Celik 2014 [Nw] (16)      | 15          |    | 42  | 35±8.9      | 22.9±1.6                       | 2012          | Kahramamaras, Turkey | 15.5                     | Day 1                                                 | Day 28         |                      |
| Celik 2014 [Ow] (16)      | 17          |    |     |             | 27.2±1.6                       |               |                      |                          |                                                       |                |                      |
| Celik 2014 [Ob] (16)      | 10          |    |     |             | 33.5±4.4                       |               |                      |                          |                                                       |                |                      |
| McNeil 2014 [Nw] (17)     | 10          |    | 20  | 20-35       | 24.4±1.9                       | 2008          | Ottawa, Canada       | 12*                      | Before onset                                          | Day 21         | 21-28 days after     |

| Publication                | Sample size |    |    | Age (years) | Pre-R BMI (kg/m <sup>2</sup> ) | Year of study | Location of study | Fasting duration (hours) | Timing of measurements (relative to the Ramadan fast) |                     |                  |
|----------------------------|-------------|----|----|-------------|--------------------------------|---------------|-------------------|--------------------------|-------------------------------------------------------|---------------------|------------------|
| McNeil 2014 [Ob] (17)      | 10          |    |    |             | 34.8±3.7                       |               |                   |                          |                                                       |                     |                  |
| Gnanou 2015 (67)           | 20          |    | 20 | 19-23       | 22.2±2.2                       |               | Malaysia          | 12                       | 1-7 days before                                       | Day 21-28           |                  |
| Soori 2015 (68)            | 35          |    | 35 | 22-64       |                                | 2014          | Iran              | 14*                      |                                                       | Last week           | After            |
| Lopez-Bueno 2015 (69)      |             | 62 | 62 | 18-61       | 26.3±5.8                       | 2012+2013     | Melilla, Spain    | 14*                      | 7 days before                                         | Day 21-28           |                  |
| Talib 2015 (70)            | 45          |    | 45 | 27-56       | 30.2±4.9                       |               | Qatar             |                          | 7 days before                                         | Day 29, 30          |                  |
| Sarici 2016 [Morning] (71) |             |    | 29 | 38.1±10.2   |                                | 2013          | Istanbul, Turkey  | 14*                      |                                                       | During              | 28 days after    |
| Syam 2016 (26)             | 7           | 36 | 43 | 34.2±11.3   | 23.7±4.0                       | 2013          | Indonesia         | 12*                      | Day 1                                                 | Day 28              | 28-35 days after |
| Sezen 2016 (72)            | 70          |    | 70 | 37±7        | 27.9±0.6                       | 2015          | Turkey            | 16.5                     | 1-7 days before                                       | 1-7 days after      |                  |
| Alsubheen 2017 (73)        | 9           |    | 9  | 32.2±7.8    | 26.5±5.0                       | 2015          | Canada            | 15*                      | 10 days before                                        | Day 30              |                  |
| Khan 2017 (74)             | 18          | 17 | 35 | 21.66±0.68  |                                | 2011          | Pakistan          | 15                       | 1-10 days before                                      | day 20-29           | 20-30 days after |
| Kiyani 2017 (75)           | 50          | 30 | 80 | 20.5        |                                | 2013          | Pakistan          | 13.5*                    | Pre-Ramadan                                           | End Ramadan         |                  |
| Latiri 2017 (76)           | 29          |    | 29 | 27 ± 5.39   | 27.1 ± 4.31                    | 2014          | Tunisia           | 16                       | 7 days before                                         | Day 16-18           | 14 days after    |
| Malekmakan 2017 (77)       | 49          | 44 | 93 | 37.2 ± 7.9  | 26.1 ± 3.3                     | 2015          | Iran              | 14.5*                    | 1-5 days before                                       | 1-3 days after      |                  |
| Norouzy 2017 (78)          | 6           | 6  | 12 | 54.6 ± 4    |                                | 2011          | Iran              | 15.5                     | Before Ramadan                                        | Last 10 days        | 30 days after    |
| Nugraha 2017 (79)          | 25          |    | 25 | 26.12 ± 4.9 | 24.78 ± 3.65                   | 2015          | Germany           | 19                       | 7 days before                                         | Days 28-30          |                  |
| Ongsara 2017 [M] (80)      | 21          |    | 65 | 20.86±1.35  | 22.94±4.12                     | 2015          | Thailand          | 12.5*                    | 1st day of Ramadan                                    | Last day of Ramadan | 30 days after    |
| Ongsara 2017 [F] (80)      |             | 44 |    | 20.8 ± 1.05 | 20.79±3.05                     |               |                   |                          |                                                       |                     |                  |
| Almeneessier 2017 (81)     | 8           |    | 8  | 26.6±4.9    | 23.7±3.5                       | 2011          | Saudi Arabia      | 13.5*                    | 0-7 days before                                       | Day 14              |                  |
| Almeneessier 2018 (82)     | 8           |    | 8  | 25.4 ± 3.5  | 24.4 ± 3.8                     | 2016          | Saudi Arabia      | 13.5*                    | 0-7 days before                                       | Day 14              |                  |

Data for age and BMI are means ± standard deviations, or range. F = female; M = male; Nw = normal weight; Ow = overweight; Ob = obese; N-Ob = non-obese; Pre-R = before Ramadan; Post-R = end of Ramadan; Follow-up = 2-5 weeks after Ramadan; BMI = body mass index; \* = fasting time not given in study but inferred based on year and location of study.

**Table S1b.** Details of weight and body composition from all included publications.

| Publication              | Weight (kg) |           |           | Method of body composition measurement | Fat percentage (%) |          |           | Absolute fat mass (kg) |           |           | Fat-free mass (kg) |          |           |
|--------------------------|-------------|-----------|-----------|----------------------------------------|--------------------|----------|-----------|------------------------|-----------|-----------|--------------------|----------|-----------|
|                          | Pre-R       | Post-R    | Follow-up |                                        | Pre-R              | Post-R   | Follow-up | Pre-R                  | Post-R    | Follow-up | Pre-R              | Post-R   | Follow-up |
| Fedail 1982 (28)         | 69.5±2.3    | 67.7±2.4  |           |                                        |                    |          |           |                        |           |           |                    |          |           |
| Husain 1987 [M] (29)     | 62.9±5.9    |           | 62.6±6.3  |                                        |                    |          |           |                        |           |           |                    |          |           |
| Husain 1987 [F] (29)     | 49.9±6.5    |           | 49.2±6.6  |                                        |                    |          |           |                        |           |           |                    |          |           |
| Takruri 1989 [Ow] (11)   | 74.8±12.3   | 72.2±12.1 |           |                                        |                    |          |           |                        |           |           |                    |          |           |
| Takruri 1989 [Nw] (11)   | 62.0±7.8    | 60.0±7.5  |           |                                        |                    |          |           |                        |           |           |                    |          |           |
| Azizi 1992 (30)          | 65.4±9.1    | 61.6±9    | 64.8±8.5  |                                        |                    |          |           |                        |           |           |                    |          |           |
| Sweileh 1992 (31)        | 72.1±10.8   | 70.2±11.5 |           | Hydrodensitometry                      | 22.7±0.6           | 20.5±6.8 |           |                        |           |           | 55.5±6.4           | 55.9±7.1 |           |
| Maislos 1993 (32)        |             | 68.0±17.0 | 68.2±16.0 |                                        |                    |          |           |                        |           |           |                    |          |           |
| El-Ati 1995 (33)         | 59.3±5.2    | 58.9±4.8  | 58.6±5.6  | Skin caliper: Harpended caliper        |                    |          |           | 16.7±5.2               | 16.2±5.2  | 16.1±4.8  | 43.3±2.4           | 43.2±2.8 | 43.1±2.8  |
| Adlouni 1998 (34)        | 69.7±10.8   | 67.8±10.7 | 69.1±10.1 |                                        |                    |          |           |                        |           |           |                    |          |           |
| Bilto 1998 (35)          | 72.0±12.6   | 70.8±13.0 | 71.1±12.9 |                                        |                    |          |           |                        |           |           |                    |          |           |
| Finch 1998 (36)          | 71.0±12.0   | 70.7±6.9  | 70.8±5.7  |                                        |                    |          |           |                        |           |           |                    |          |           |
| Kayikcioglu 1998 (37)    | 71.7±7.3    | 70.7±7.0  |           |                                        |                    |          |           |                        |           |           |                    |          |           |
| Fakhrzadeh 2003 [M] (38) | 65.0±8.4    | 63.7±7.9  |           |                                        |                    |          |           |                        |           |           |                    |          |           |
| Fakhrzadeh 2003 [F] (38) | 60.7±13.0   | 60.3±14.2 |           |                                        |                    |          |           |                        |           |           |                    |          |           |
| Kassab 2003 [N-Ob] (12)  | 72.5±13.3   | 71.7±15.3 | 72.3±12.8 | Bioelectrical impedance                | 29.1±7.7           | 29.5±8.1 | 29.0±8.7  | 17.7±6.1               | 17.5±6.6  | 17.6±7.1  |                    |          |           |
| Kassab 2003 [Ob] (12)    | 89.0±22.0   | 88.6±22.5 | 88.6±22.5 |                                        | 38.8±4.7           | 37.4±7.2 | 38.9±4.7  | 34.9±10.2              | 31.3±8.5  | 34.8±10.6 |                    |          |           |
| Kassab 2004 (39)         | 80.8±9.5    | 80.1±13.6 | 80.5±12.2 | Bioelectrical impedance: OMRON BF 302  | 32.8±8.8           | 32.5±9.5 | 32.9±11.5 | 23.9±12.2              | 22.4±11.5 | 23.7±12.9 |                    |          |           |
| Rahman 2004 (40)         | 64.1±7.8    | 62.1±8.1  | 63.1±7.8  |                                        |                    |          |           |                        |           |           |                    |          |           |
| Saleh 2004 (18)          | 98.9±19.2   | 97.4±19.9 | 97.7±23.5 | Equation from Filer et al. (1998)      | 49.6±10.8          | 44.7±6.4 | 45.7±7.8  |                        |           |           |                    |          |           |
| Yucel 2004 [M] (41)      | 75.9±15.0   | 75.8±15   |           |                                        |                    |          |           |                        |           |           |                    |          |           |
| Yucel 2004 [F] (41)      | 62.1±10.4   | 60.6±9.5  |           |                                        |                    |          |           |                        |           |           |                    |          |           |
| Aksungar 2005 (42)       | 82.2±5.5    | 82.5±6.1  | 82.4±5.2  |                                        |                    |          |           |                        |           |           |                    |          |           |

| Publication                  | Weight (kg) |           |           | Method of body composition measurement                    | Fat percentage (%) |           |           | Absolute fat mass (kg) |           |  | Fat-free mass (kg) |           |          |
|------------------------------|-------------|-----------|-----------|-----------------------------------------------------------|--------------------|-----------|-----------|------------------------|-----------|--|--------------------|-----------|----------|
| Al-Numair 2006 (43)          | 85.5±3.9    | 83.2±3.3  |           |                                                           |                    |           |           |                        |           |  |                    |           |          |
| Dewanti 2006 (22)            | 64.5±11.1   | 63.0±10.8 |           |                                                           |                    |           |           |                        |           |  |                    |           |          |
| Lamine 2006 (44)             | 61.3±10.2   | 61.7±10.4 | 62.1±10.5 |                                                           |                    |           |           |                        |           |  |                    |           |          |
| Subhan 2006 (45)             | 70.5±14.9   | 70.0±14.9 | 70.8±14.5 |                                                           |                    |           |           |                        |           |  |                    |           |          |
| Ziaee 2006 [M] (23)          | 68.7±12.1   | 67.5±10.8 |           |                                                           |                    |           |           |                        |           |  |                    |           |          |
| Ziaee 2006 [F] (23)          | 55.7±5.8    | 54.6±5.9  |           |                                                           |                    |           |           |                        |           |  |                    |           |          |
| Al-Hourani 2007 (46)         | 57.5±8.2    | 56.9±7.4  |           | Bioelectrical impedance: Tanita BC-532 total inner scan   | 24.9±6.6           | 24.5±6.8  |           |                        |           |  | 40.5±3.4           | 40.4±2.2  |          |
| Mansi 2007 (47)              | 76.6±9.5    | 72.7±9.2  | 73.6±8.8  |                                                           |                    |           |           |                        |           |  |                    |           |          |
| Moosavi 2007 [M] (48)        | 70.4±10.3   | 69.5±10.4 | 69.8±10.5 |                                                           |                    |           |           |                        |           |  |                    |           |          |
| Moosavi 2007 [F] (48)        | 62.2±8.6    | 61.1±8.7  | 61.8±8.5  |                                                           |                    |           |           |                        |           |  |                    |           |          |
| Souissi 2007 (49)            | 71.3±2.33   | 71.7±7.2  | 71.7±7.5  |                                                           |                    |           |           |                        |           |  |                    |           |          |
| Haouari 2008 (19)            | 70.9±2.1    | 70.5±2.1  |           |                                                           |                    |           |           |                        |           |  |                    |           |          |
| Ibrahim 2008 (50)            | 70.5±10.9   | 69.1±10.6 |           | Bioelectrical impedance: TANITA body composition analyser |                    |           |           | 21.7±10.5              | 22.1±10.2 |  | 48.4±11.3          | 47.3±10.5 |          |
| Stannard 2008 (51)           | 71.1±6.9    | 69.8±7.3  |           | Hydrodensitometry                                         | 12.9±3.5           | 12.2±3.2  |           | 9.1±2.1                | 8.4±1.7   |  | 62.0±7.7           | 62.1±7.9  |          |
| Lamri-Senhadji 2009 [M] (20) | 70.0±42.2   | 70.0±46.9 | 70.0±51.6 |                                                           |                    |           |           |                        |           |  |                    |           |          |
| Lamri-Senhadji 2009 [F] (20) | 53.0±39.2   | 52.0±44.1 | 54.0±44.1 |                                                           |                    |           |           |                        |           |  |                    |           |          |
| Pathan 2010 (52)             | 61.9±11.4   | 60.6±10.7 |           |                                                           |                    |           |           |                        |           |  |                    |           |          |
| Assadi 2011 (53)             | 78.6±12.1   | 77.2±12.7 |           |                                                           |                    |           |           |                        |           |  |                    |           |          |
| Trabelsi 2011 (24)           | 79.2±3.0    | 77.7±3.0  | 78.7±2.7  | Skin caliper: Harpended caliper                           | 19.4±1.3           | 18.2±0.7  | 18.9±1.5  |                        |           |  | 63.8±3.0           | 63.6±2.7  | 63.9±3.1 |
| Ünalacak 2011 [Ob] (13)      | 83.2±8.4    | 80.3±7.9  |           |                                                           |                    |           |           |                        |           |  |                    |           |          |
| Ünalacak 2011 [Nw] (13)      | 71.9±5.9    | 71.1±6.0  |           |                                                           |                    |           |           |                        |           |  |                    |           |          |
| Faris 2012a (54)             | 71.8±13.4   | 70.6±13.2 | 71.9±13.5 | Bioelectrical impedance: TANITA body composition analyser | 24.1±12.6          | 20.4±11.3 | 30.4±11.3 |                        |           |  |                    |           |          |
| Faris 2012b (55)             | 72.5±14.0   | 71.7±13.7 | 72.6±14.0 | Bioelectrical impedance: GIMA body fat analyser           | 24.3±12.0          | 21.2±11.5 | 30.3±10.7 |                        |           |  |                    |           |          |
| Hajek 2012 (56)              | 71.2±12.4   | 70.6±12.5 | 71.1±12.5 |                                                           |                    |           |           |                        |           |  |                    |           |          |

| Publication               | Weight (kg) |           |           | Method of body composition measurement             | Fat percentage (%) |           |           | Absolute fat mass (kg) |          |          | Fat-free mass (kg) |          |          |
|---------------------------|-------------|-----------|-----------|----------------------------------------------------|--------------------|-----------|-----------|------------------------|----------|----------|--------------------|----------|----------|
| Khattak 2012 [M, Nw] (14) | 60.2±5.6    | 53.5±4.6  |           | Bioelectrical impedance: MALTRON BioScan           | 13.7±3.4           | 14.1±2.9  |           |                        |          |          |                    |          |          |
| Khattak 2012 [M, Ob] (14) | 102.8±6.1   | 87.0±10.8 |           |                                                    | 33.8±3.9           | 33.1±2.1  |           |                        |          |          |                    |          |          |
| Khattak 2012 [F, Nw] (14) | 59.3±6.2    | 51.9±4.7  |           |                                                    | 26.4±9.8           | 26.8±10.0 |           |                        |          |          |                    |          |          |
| Khattak 2012 [F, Ob] (14) | 100.7±7.5   | 85.3±11.3 |           |                                                    | 44.4±1.3           | 43.8±0.9  |           |                        |          |          |                    |          |          |
| Shehab 2012 [M] (57)      | 82.9±14.6   | 81.8±14.6 | 82.4±15.1 |                                                    |                    |           |           |                        |          |          |                    |          |          |
| Shehab 2012 [F] (57)      | 68.5±15.1   | 67.9±15.3 | 68.3±14.9 |                                                    |                    |           |           |                        |          |          |                    |          |          |
| Racinais 2012 (58)        | 70.9±10.8   | 70.0±8.9  | 70.8±8.6  | Bioelectrical impedance: Quantum II                |                    |           |           | 14.9±6.3               | 14.1±4.8 | 15.4±4.6 | 55.7±6.9           | 55.9±6.5 | 55.5±5.8 |
| Agoumi 2013 (59)          | 77.8±15.3   | 76.7±15.1 | 76.8±14.8 | Bioelectrical impedance: Medisana electronic scale | 30.3±11.0          | 30.5±12.0 | 31.1±11.6 |                        |          |          |                    |          |          |
| Develioglu 2013 (60)      | 77.2±11.4   | 76.0±11.7 |           |                                                    |                    |           |           |                        |          |          |                    |          |          |
| Haouari-Oukerro 2013 (61) | 70.0±0.7    | 68.7±0.6  |           | Bioelectrical impedance: Tanita TBF-401 A''        |                    |           |           | 10.1±0.3               | 9.1±0.3  |          | 59.6±0.5           | 58.9±0.5 |          |
| Norouzy 2013[M,18-35](62) | 76.8±9.5    | 75.1±9.5  |           | Bioelectrical impedance: Jawon Plus Avis 333       |                    |           |           | 20.6±5.0               | 19.7±5.6 |          | 56.5±6.1           | 55.3±5.6 |          |
| Norouzy 2013[F,18-35](62) | 59.9±12.1   | 59.1±12.1 |           |                                                    |                    |           |           | 19.1±7.1               | 18.7±7.1 |          | 41.0±5.7           | 40.5±5.0 |          |
| Norouzy 2013[M,36-70](62) | 76.5±11.3   | 75.3±11.3 |           |                                                    |                    |           |           | 20.6±5.6               | 20.1±5.6 |          | 55.9±6.8           | 55.4±6.8 |          |
| Norouzy 2013[F,36-70](62) | 67.2±10.6   | 66.7±11.1 |           |                                                    |                    |           |           | 23.8±6.7               | 24.0±6.7 |          | 43.5±5.0           | 42.6±5.0 |          |
| Rohin 2013 [Nw] (15)      | 53.6±7.8    | 52.4±7.6  | 52.8±7.8  | Bioelectrical impedance: Omron Karada Scan HBF-36  | 29.8±6.1           | 28.6±5.5  | 28.7±5.5  |                        |          |          |                    |          |          |
| Rohin 2013 [Ow] (15)      | 71.2±7.1    | 69.9±7.2  | 70.2±7.2  |                                                    | 31.1±4.5           | 30.7±4.6  | 30.5±4.9  |                        |          |          |                    |          |          |
| Rohin 2013 [Ob] (15)      | 82.6±9.3    | 80.9±10.0 | 80.4±10.8 |                                                    | 35.5±4.3           | 34.4±4.7  | 34.77±4.5 |                        |          |          |                    |          |          |
| Sayedda 2013 (63)         | 71.1±8.2    | 68.9±8.0  |           |                                                    |                    |           |           |                        |          |          |                    |          |          |
| Akaberi 2014 (64)         | 71.6±12.1   | 70.2±11.5 |           |                                                    |                    |           |           |                        |          |          |                    |          |          |
| Feizollahzadeh 2014 (65)  | 79.8±8.95   | 77.9±8.93 |           |                                                    |                    |           |           |                        |          |          |                    |          |          |
| Cansel 2014 (66)          | 61.8±7.5    | 62.3±7.1  |           |                                                    |                    |           |           |                        |          |          |                    |          |          |
| Celik 2014 [Nw] (16)      | 69.1±7.3    | 67.8±6.9  |           |                                                    |                    |           |           |                        |          |          |                    |          |          |
| Celik 2014 [Ow] (16)      | 81.8±6.8    | 80.5±7    |           |                                                    |                    |           |           |                        |          |          |                    |          |          |
| Celik 2014 [Ob] (16)      | 101.1±15.1  | 98.3±13.9 |           |                                                    |                    |           |           |                        |          |          |                    |          |          |

| Publication                | Weight (kg) |             |            | Method of body composition measurement                       | Fat percentage (%) |          |          | Absolute fat mass (kg) |           |           | Fat-free mass (kg) |          |          |
|----------------------------|-------------|-------------|------------|--------------------------------------------------------------|--------------------|----------|----------|------------------------|-----------|-----------|--------------------|----------|----------|
| McNeil 2014 [Nw] (17)      | 72.8±9.2    | 71.8±9.4    | 72.1±9.6   | Bioelectrical impedance: Tanita HR-100                       |                    |          |          | 17.6±4.2               | 17.6±4.5  | 17.4±4.9  | 55.1±5.9           | 54.1±5.8 | 54.6±5.7 |
| McNeil 2014 [Ob] (17)      | 107.9±15.7  | 105.3±15.4  | 105.0±15.1 |                                                              |                    |          |          | 39.1±10.3              | 37.7±19.6 | 37.8±9.7  | 68.2±9.4           | 67.1±9.5 | 67.0±8.6 |
| Gnanou 2015 (67)           | 63.1±8.19.0 | 61.6±8.11.0 |            |                                                              |                    |          |          |                        |           |           |                    |          |          |
| Soori 2015 (68)            |             | 77.3±10.6   | 80.75±10.9 |                                                              |                    |          |          |                        |           |           |                    |          |          |
| Lopez-Bueno 2015 (69)      | 67.2±14.1   | 66.1±15.0   |            | Bioelectrical impedance: TANITA SC-330                       | 32.10±9.4          | 31.4±9.5 |          |                        |           |           |                    |          |          |
| Talib 2015 (70)            | 94.7±17.3   | 94.0±17.2   |            |                                                              |                    |          |          |                        |           |           |                    |          |          |
| Sarici 2016 [Morning] (71) |             | 72.7±12.7   | 73.5±13.5  |                                                              |                    |          |          |                        |           |           |                    |          |          |
| Syam 2016 (26)             | 59.8±11.3   | 59.9±11.2   | 58.7±10.6  | Bioelectrical impedance: GAIA 359 PLUS                       |                    |          |          | 17.0±6.4               | 16.5±6.3  |           |                    |          |          |
| Sezen 2016 (72)            |             |             |            | Bioelectrical impedance: Segmental body composition analyser | 22.5 ± 5.0         | 21.7±4.6 |          | 18.5±5.2               | 17.6±4.7  |           | 63.0±6.9           | 62.7±6.7 |          |
| Alsubheen 2017 (73)        | 82.9±15.8   |             |            | Hydrodensitometry                                            | 29.6±8.4           |          |          | 25.7±10.8              |           |           | 57.3±7.4           |          |          |
| Khan 2017 (74)             | 60.5±14.7   | 60.5±15.0   | 60.2±14.5  |                                                              |                    |          |          |                        |           |           |                    |          |          |
| Kiyani 2017 (75)           | 62.7 ± 8.8  | 62.3±9.0    |            |                                                              |                    |          |          |                        |           |           |                    |          |          |
| Latiri 2017 (76)           | 81.6±15.29  | 80.8±15.62  | 81.2±15.6  |                                                              |                    |          |          |                        |           |           |                    |          |          |
| Malekmakan 2017 (77)       | 71.6±12.4   | 70.4±12.0   |            |                                                              |                    |          |          |                        |           |           |                    |          |          |
| Norouzy 2017 (78)          | 67.4±12     | 67.5±12     | 67.2±11    |                                                              |                    |          |          |                        |           |           |                    |          |          |
| Nugraha 2017 (79)          | 77.8±12.3   | 76.04±12.7  |            | Bioelectrical impedance: InBody 230                          | 20.92 ± 7.05       | 20.5±6.3 |          | 16.7±7.4               | 17.3±9.7  |           | 61.2 ± 8.6         | 60.1±8.8 |          |
| Ongsara 2017 [M] (80)      | 64.6±15.3   | 63.7±15.4   | 64.7±16.0  | Bioelectrical impedance: TANITA SC-330                       | 18.17±7.35         | 17.6±6.5 | 21.0±8.9 | 12.7±7.9               | 12.2±7.5  | 14.9±10.4 | 52.5±8.4           | 52.2±8.5 | 50.5±7.9 |
| Ongsara 2017 [F] (80)      | 51.4±9.1    | 51.0±9.9    | 51.3±9.1   |                                                              | 26.58±5.79         | 25.2±6.5 | 26.4±5.8 | 14.1±5.6               | 13.1±5.6  | 13.9±5.6  | 37.3±4.1           | 37.4±4.1 | 37.2±4.1 |
| Almeneessier 2017 (81)     | 69.1±8.4    | 66.3±12.3   |            |                                                              |                    |          |          |                        |           |           |                    |          |          |
| Almeneessier 2018 (82)     | 71.2 ± 7.9  | 69.6±10.8   |            |                                                              |                    |          |          |                        |           |           |                    |          |          |

Data are means ± standard deviations. F = female; M = male; Nw = normal weight; Ow = overweight; Ob = obese; N-Ob = non-obese; Pre-R= before Ramadan; Post-R = end of Ramadan; Follow-up = 2-5 weeks after Ramadan.

**Table S1c.** Details of physical activity for all included publications.

| Publication              | Method of physical activity measurement                                                   | Maximum effort physical activity |          |           | Daily physical activity |        |           |
|--------------------------|-------------------------------------------------------------------------------------------|----------------------------------|----------|-----------|-------------------------|--------|-----------|
|                          |                                                                                           | Pre-R                            | Post-R   | Follow-up | Pre-R                   | Post-R | Follow-up |
| Fedail 1982 (28)         |                                                                                           |                                  |          |           |                         |        |           |
| Husain 1987 [M] (29)     |                                                                                           |                                  |          |           |                         |        |           |
| Husain 1987 [F] (29)     |                                                                                           |                                  |          |           |                         |        |           |
| Takruri 1989 [Ow] (11)   |                                                                                           |                                  |          |           |                         |        |           |
| Takruri 1989 [Nw] (11)   |                                                                                           |                                  |          |           |                         |        |           |
| Azizi 1992 (30)          |                                                                                           |                                  |          |           |                         |        |           |
| Sweileh 1992 (31)        | VO <sub>2</sub> max using Quinton treadmill and Beckman medical gas analyzers (ml/kg/min) | 39.0±4.5                         | 40.5±5.1 |           |                         |        |           |
| Maislos 1993 (32)        |                                                                                           |                                  |          |           |                         |        |           |
| El-Ati 1995 (33)         |                                                                                           |                                  |          |           |                         |        |           |
| Adlouni 1998 (34)        |                                                                                           |                                  |          |           |                         |        |           |
| Bilto 1998 (35)          |                                                                                           |                                  |          |           |                         |        |           |
| Finch 1998 (36)          |                                                                                           |                                  |          |           |                         |        |           |
| Kayikcioglu 1998 (37)    |                                                                                           |                                  |          |           |                         |        |           |
| Fakhrzadeh 2003 [M] (38) |                                                                                           |                                  |          |           |                         |        |           |
| Fakhrzadeh 2003 [F] (38) |                                                                                           |                                  |          |           |                         |        |           |
| Kassab 2003 [N-Ob] (12)  |                                                                                           |                                  |          |           |                         |        |           |
| Kassab 2003 [Ob] (12)    |                                                                                           |                                  |          |           |                         |        |           |
| Kassab 2004 (39)         |                                                                                           |                                  |          |           |                         |        |           |
| Rahman 2004 (40)         |                                                                                           |                                  |          |           |                         |        |           |
| Saleh 2004 (18)          |                                                                                           |                                  |          |           |                         |        |           |
| Yucel 2004 [M] (41)      |                                                                                           |                                  |          |           |                         |        |           |
| Yucel 2004 [F] (41)      |                                                                                           |                                  |          |           |                         |        |           |
| Aksungar 2005 (42)       |                                                                                           |                                  |          |           |                         |        |           |

| Publication                 | Method of physical activity measurement      | Maximum effort physical activity |         |         | Daily physical activity |  |  |
|-----------------------------|----------------------------------------------|----------------------------------|---------|---------|-------------------------|--|--|
| Al-Numair 2006 (43)         |                                              |                                  |         |         |                         |  |  |
| Dewanti 2006 (22)           |                                              |                                  |         |         |                         |  |  |
| Lamine 2006 (44)            |                                              |                                  |         |         |                         |  |  |
| Subhan 2006 (45)            |                                              |                                  |         |         |                         |  |  |
| Ziaee 2006 [M] (23)         |                                              |                                  |         |         |                         |  |  |
| Ziaee 2006 [F] (23)         |                                              |                                  |         |         |                         |  |  |
| Al-Hourani 2007 (46)        |                                              |                                  |         |         |                         |  |  |
| Mansi 2007 (47)             |                                              |                                  |         |         |                         |  |  |
| Moosavi 2007 [M] (48)       |                                              |                                  |         |         |                         |  |  |
| Moosavi 2007 [F] (48)       |                                              |                                  |         |         |                         |  |  |
| Souissi 2007 (49)           | Mean power output during Wingate test (W/kg) | 9.0±1.9                          | 8.6±2.4 | 8.9±2.2 |                         |  |  |
| Haouari 2008 (19)           |                                              |                                  |         |         |                         |  |  |
| Ibrahim 2008 (50)           |                                              |                                  |         |         |                         |  |  |
| Stannard 2008 (51)          |                                              |                                  |         |         |                         |  |  |
| Lamri-Senhadjji2009 [M](20) |                                              |                                  |         |         |                         |  |  |
| Lamri-Senhadjji 2009[F](20) |                                              |                                  |         |         |                         |  |  |
| Pathan 2010 (52)            |                                              |                                  |         |         |                         |  |  |
| Assadi 2011 (53)            |                                              |                                  |         |         |                         |  |  |
| Trabelsi 2011 (24)          |                                              |                                  |         |         |                         |  |  |
| Ünalacak 2011 [Ob] (13)     |                                              |                                  |         |         |                         |  |  |
| Ünalacak 2011 [Nw] (13)     |                                              |                                  |         |         |                         |  |  |
| Faris 2012a (54)            |                                              |                                  |         |         |                         |  |  |
| Faris 2012b (55)            |                                              |                                  |         |         |                         |  |  |
| Hajek 2012 (56)             |                                              |                                  |         |         |                         |  |  |
| Khattak 2012 [M, Nw] (14)   |                                              |                                  |         |         |                         |  |  |
| Khattak 2012 [M, Ob] (14)   |                                              |                                  |         |         |                         |  |  |
| Khattak 2012 [F, Nw] (14)   |                                              |                                  |         |         |                         |  |  |

| Publication               | Method of physical activity measurement          | Maximum effort physical activity |            |            | Daily physical activity |  |  |
|---------------------------|--------------------------------------------------|----------------------------------|------------|------------|-------------------------|--|--|
| Khattak 2012 [F, Ob] (14) |                                                  |                                  |            |            |                         |  |  |
| Shehab 2012 [M] (57)      |                                                  |                                  |            |            |                         |  |  |
| Shehab 2012 [F] (57)      |                                                  |                                  |            |            |                         |  |  |
| Racinais 2012 (58)        | Maximal voluntary contraction of quadriceps (Nm) | 244.6±34.0                       | 244.3±26.5 | 252.5±30.6 |                         |  |  |
| Agoumi 2013 (59)          |                                                  |                                  |            |            |                         |  |  |
| Develioglu 2013 (60)      |                                                  |                                  |            |            |                         |  |  |
| Haouari-Oukerro 2013 (61) |                                                  |                                  |            |            |                         |  |  |
| Norouzy 2013[M,18-35](62) |                                                  |                                  |            |            |                         |  |  |
| Norouzy 2013[F,18-35](62) |                                                  |                                  |            |            |                         |  |  |
| Norouzy 2013[M,36-70](62) |                                                  |                                  |            |            |                         |  |  |
| Norouzy 2013[F,36-70](62) |                                                  |                                  |            |            |                         |  |  |
| Rohin 2013 [Nw] (15)      |                                                  |                                  |            |            |                         |  |  |
| Rohin 2013 [Ow] (15)      |                                                  |                                  |            |            |                         |  |  |
| Rohin 2013 [Ob] (15)      |                                                  |                                  |            |            |                         |  |  |
| Sayedda 2013 (63)         |                                                  |                                  |            |            |                         |  |  |
| Akabetri 2014 (64)        |                                                  |                                  |            |            |                         |  |  |
| Feizollahzadeh 2014 (65)  |                                                  |                                  |            |            |                         |  |  |
| Cansel 2014 (66)          |                                                  |                                  |            |            |                         |  |  |
| Celik 2014 [Nw] (16)      |                                                  |                                  |            |            |                         |  |  |
| Celik 2014 [Ow] (16)      |                                                  |                                  |            |            |                         |  |  |
| Celik 2014 [Ob] (16)      |                                                  |                                  |            |            |                         |  |  |
| McNeil 2014 [Nw] (17)     |                                                  |                                  |            |            |                         |  |  |
| McNeil 2014 [Ob] (17)     |                                                  |                                  |            |            |                         |  |  |
| Gnanou 2015 (67)          |                                                  |                                  |            |            |                         |  |  |
| Soori 2015 (68)           |                                                  |                                  |            |            |                         |  |  |
| Lopez-Bueno 2015 (69)     |                                                  |                                  |            |            |                         |  |  |
| Talib 2015 (70)           |                                                  |                                  |            |            |                         |  |  |

| Publication                | Method of physical activity measurement                                                                                    | Maximum effort physical activity |  |  | Daily physical activity |               |             |
|----------------------------|----------------------------------------------------------------------------------------------------------------------------|----------------------------------|--|--|-------------------------|---------------|-------------|
| Sarici 2016 [Morning] (71) |                                                                                                                            |                                  |  |  |                         |               |             |
| Syam 2016 (26)             |                                                                                                                            |                                  |  |  |                         |               |             |
| Sezen 2016 (72)            |                                                                                                                            |                                  |  |  |                         |               |             |
| Alsubheen 2017 (73)        | Physical activity tracker (Vivofit) (Steps/day)                                                                            |                                  |  |  | 6368.0±1556.0           | 6714.0±1627.0 |             |
| Khan 2017 (74)             | Physical activity = MET (metabolic energy turnover) value<br>× duration (min per session) × frequency (activity per week). |                                  |  |  | 172.5±241.9             | 136.1±165.5   | 236.3±281.2 |
| Kiyani 2017 (75)           |                                                                                                                            |                                  |  |  |                         |               |             |
| Latiri 2017 (76)           |                                                                                                                            |                                  |  |  |                         |               |             |
| Malekmakan 2017 (77)       |                                                                                                                            |                                  |  |  |                         |               |             |
| Norouzy 2017 (78)          |                                                                                                                            |                                  |  |  |                         |               |             |
| Nugraha 2017 (79)          | SF-12 questionnaire for physical health                                                                                    |                                  |  |  | 52.6±5.4                | 50.3±7.5      |             |
| Ongsara 2017 [M] (80)      |                                                                                                                            |                                  |  |  |                         |               |             |
| Ongsara 2017 [F] (80)      |                                                                                                                            |                                  |  |  |                         |               |             |
| Almeneessier 2017 (81)     |                                                                                                                            |                                  |  |  |                         |               |             |
| Almeneessier 2018 (82)     |                                                                                                                            |                                  |  |  |                         |               |             |

Data are means ± standard deviations. F = female; M = male; Nw = normal weight; Ow = overweight; Ob = obese; N-Ob = non-obese; Pre-R= before Ramadan; Post-R = end of Ramadan; Follow-up = 2-5 weeks after Ramadan.

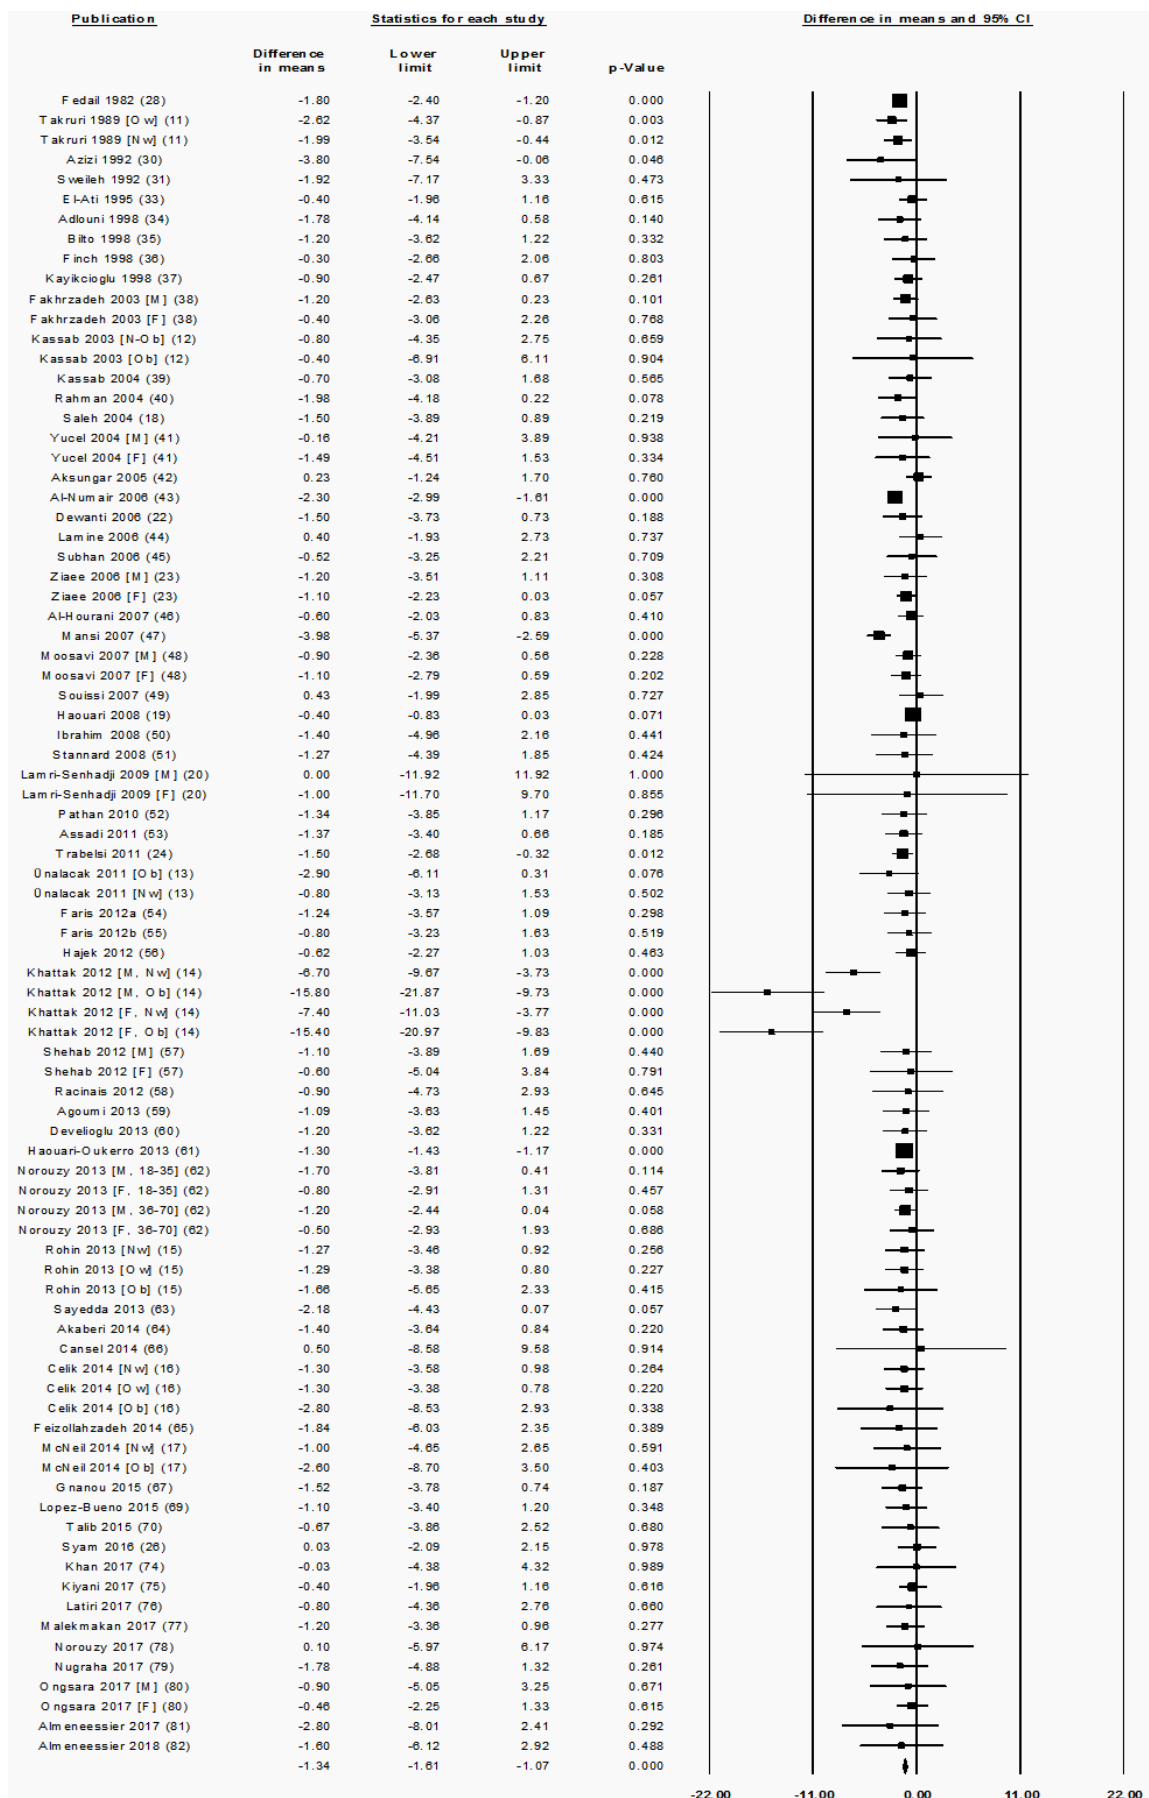

**Figure S1.** Weight was significantly decreased by Ramadan fasting. Change in weight (kg) between pre-Ramadan (pre-R) and the end of Ramadan (post-R). Heterogeneity statistics:  $T = 0.586$ ,  $p < 0.001$ ,  $I^2 = 40.6\%$ . F = female; M = male; Nw = normal weight; Ow = overweight; Ob = obese; N-Ob = non-obese; 18-35, 36-70 = age range in years.

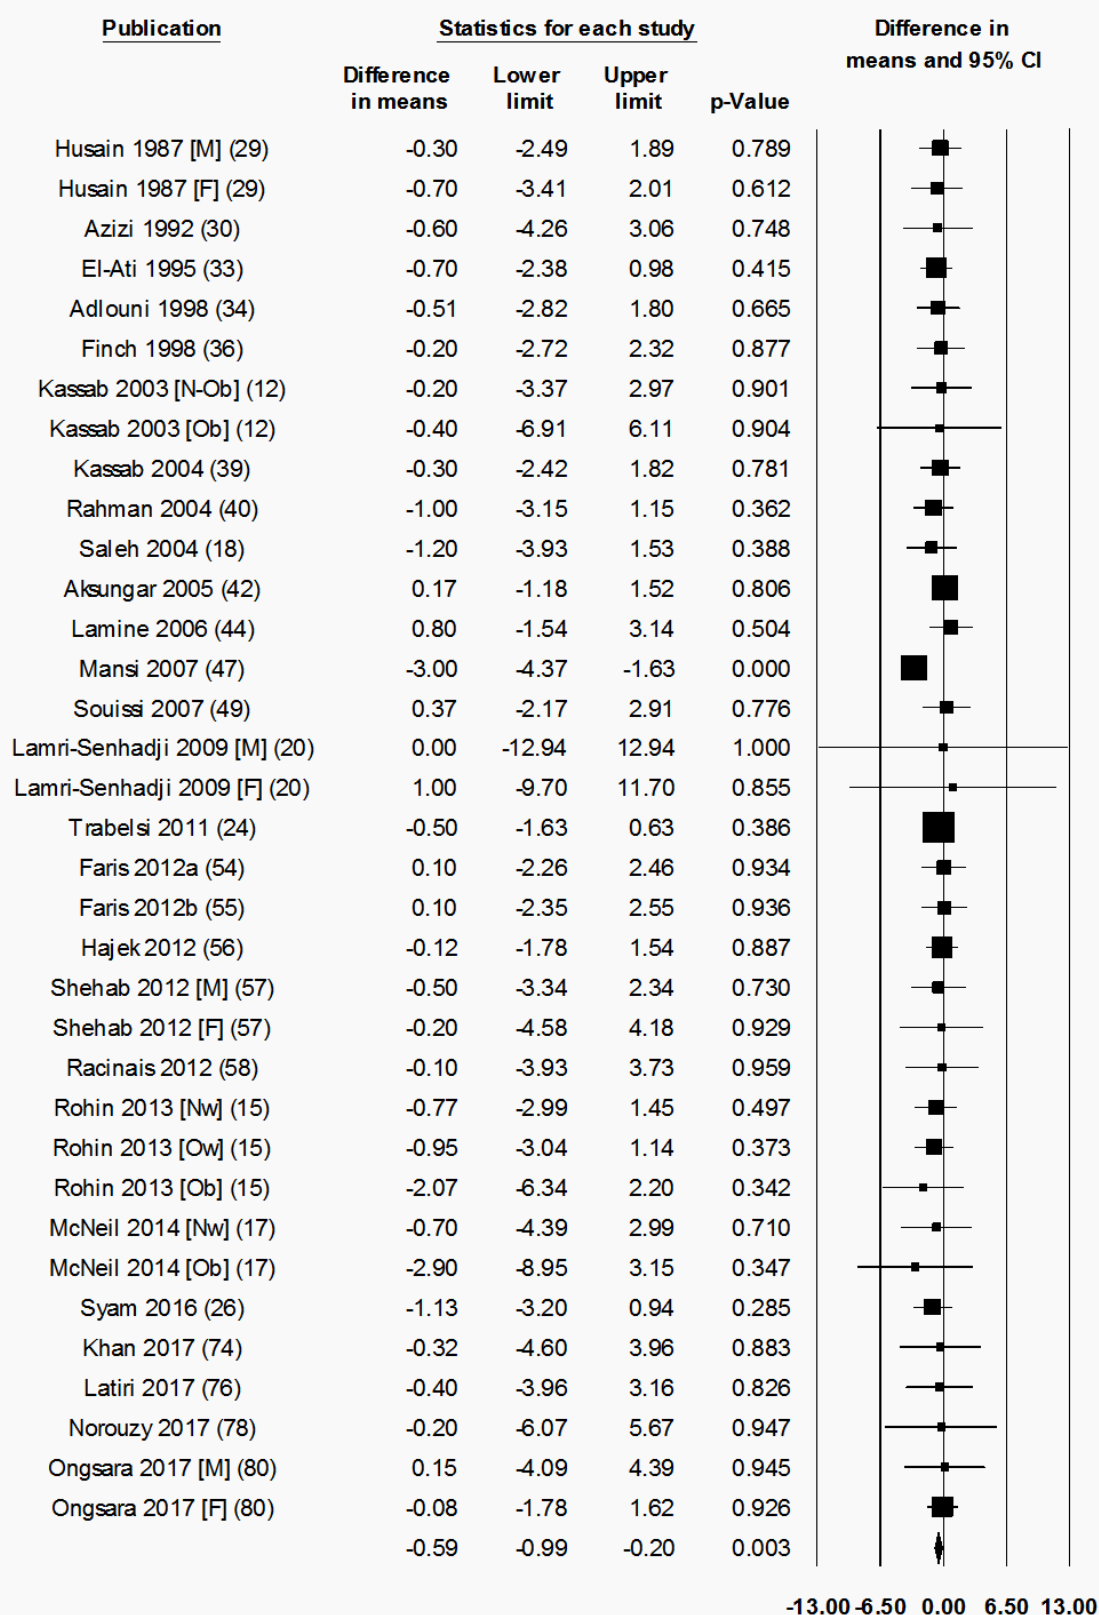

**Figure S2.** Weight was significantly reduced at 2-5 weeks after Ramadan fasting. Change in weight (kg) between pre-Ramadan (pre-R) and 2-5 weeks after Ramadan (follow-up). Heterogeneity statistics:  $T = 0.000$ ,  $p = 0.940$ ,  $I^2 = 0.0\%$ . F = female; M = male; Nw = normal weight; Ow = overweight; Ob = obese; N-Ob = non-obese.

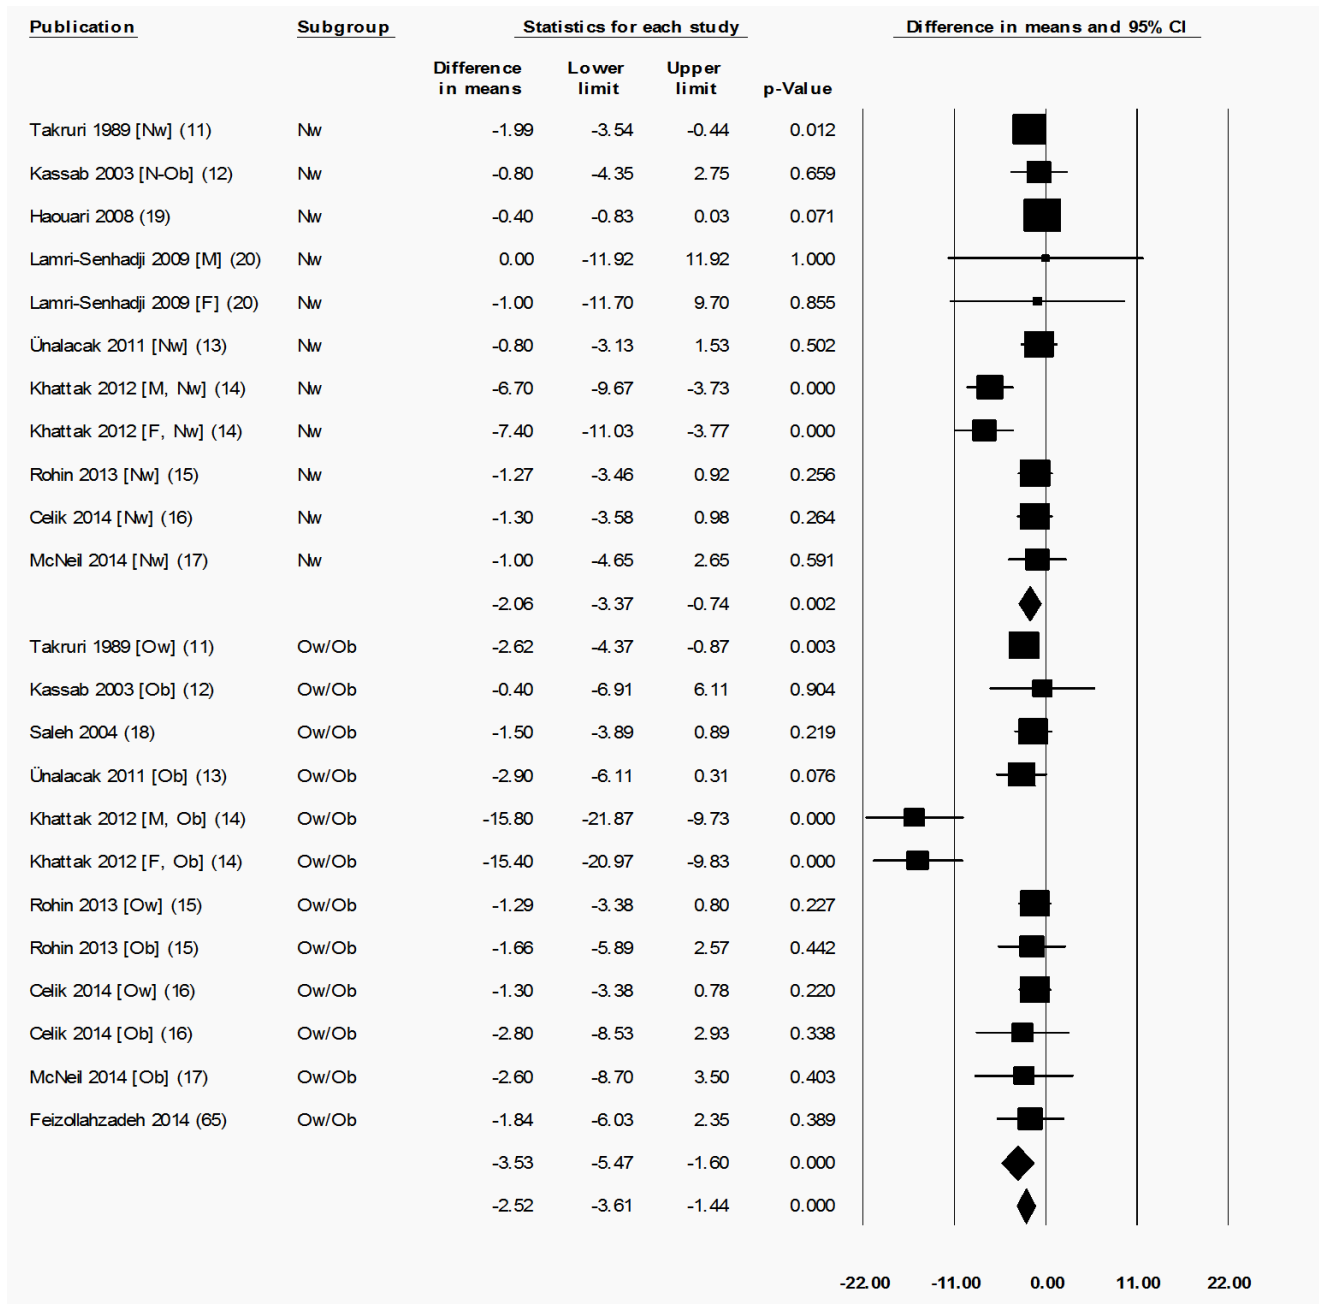

**Figure S3.** Weight was significantly decreased by Ramadan fasting in both the normal weight and the overweight/obese subgroup by the end of Ramadan. Change in weight (kg) as subdivided by BMI category (normal weight and overweight/obese), between pre-Ramadan (pre-R) and the end of Ramadan (post-R). There was no significant difference between normal weight and overweight/obese subgroups ( $p = 0.217$ ). Heterogeneity statistics: normal weight  $T = 1.607$ ,  $p < 0.001$ ,  $I^2 = 70.4\%$ ; overweight/obese  $T = 2.738$ ,  $p < 0.001$ ,  $I^2 = 74.4\%$ . F = female; M = male; Nw = normal weight; Ow = overweight; Ob = obese; N-Ob = non-obese.

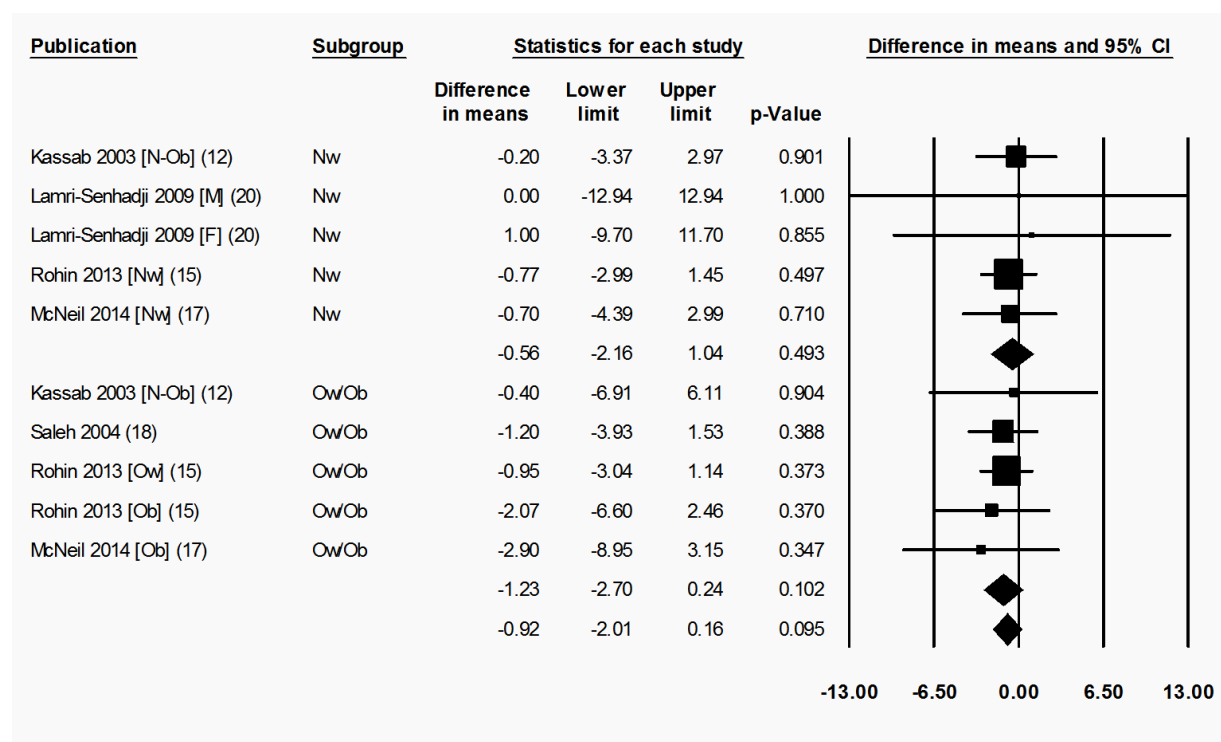

**Figure S4.** Weight was not significantly reduced at 2-5 weeks after Ramadan in the normal weight or the overweight/obese subgroup. Change in weight (kg) as subdivided by BMI category (normal weight and overweight/obese), between pre-Ramadan (pre-R) and 2-5 weeks after Ramadan (follow-up). There was no significant difference between normal weight and overweight/obese subgroups ( $p = 0.547$ ). Heterogeneity statistics: normal weight  $T = 0.000$ ,  $p = 0.996$ ,  $I^2 = 0.0\%$ ; overweight/obese  $T = 0.000$ ,  $p = 0.968$ ,  $I^2 = 0.0\%$ . F = female; M = male; Nw = normal weight; Ow = overweight; Ob = obese; N-Ob = non-obese.

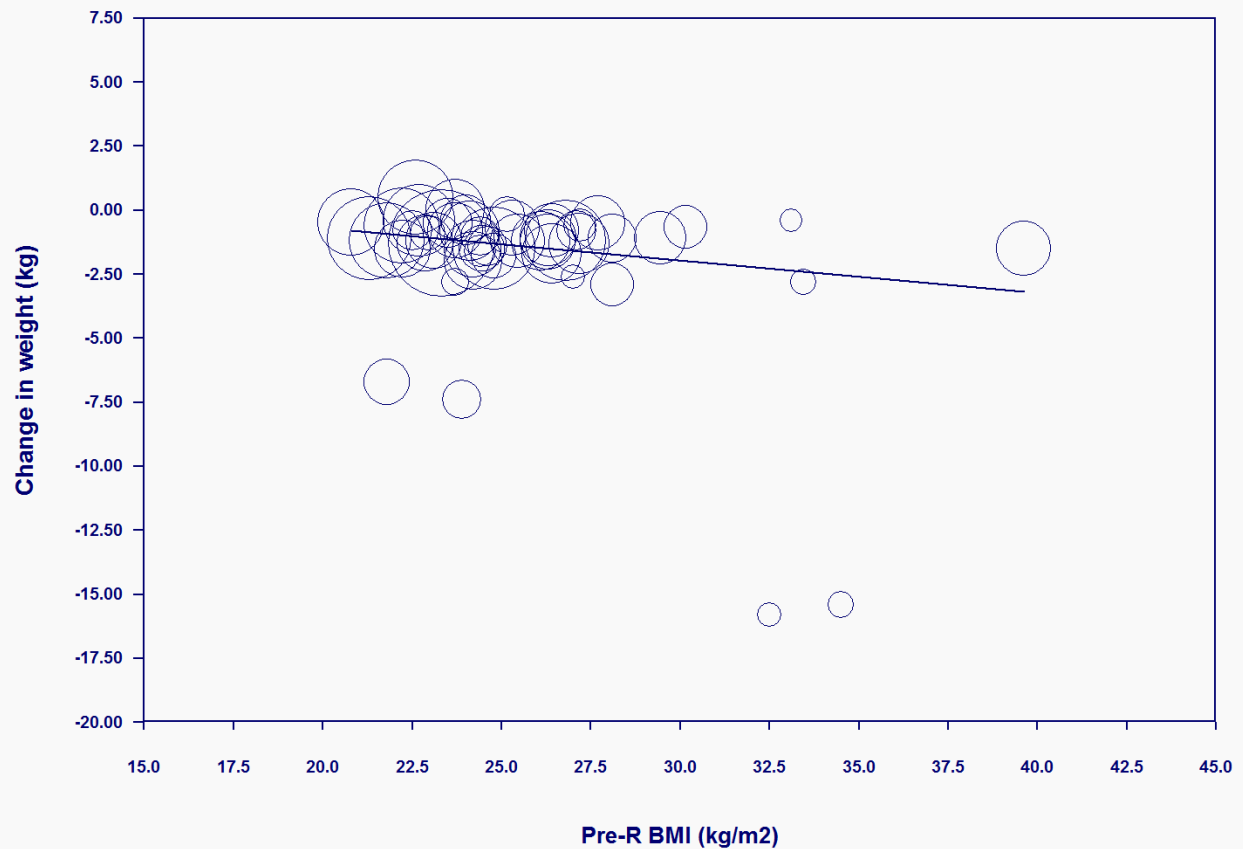

**Figure S5.** Significant correlation between BMI before Ramadan fasting and mean weight change. Scatterplot of the meta-regression analysis for the correlation between BMI measured pre-Ramadan (pre-R) and weight change from pre-R to the end of Ramadan (post-R) for each of the 51 comparison groups taken from publications that obtained both pre-R BMI and weight data at these two time points (pre-R and post-R). The area of each circle represents the percentage weight contributed by each study to the overall meta-regression, with larger circles representing greater weight contributions. The correlation was statistically significant ( $p = 0.045$ ). Heterogeneity statistics:  $T = 0.726$ ,  $p = 0.002$ ,  $I^2 = 40.85\%$ . BMI = body mass index.

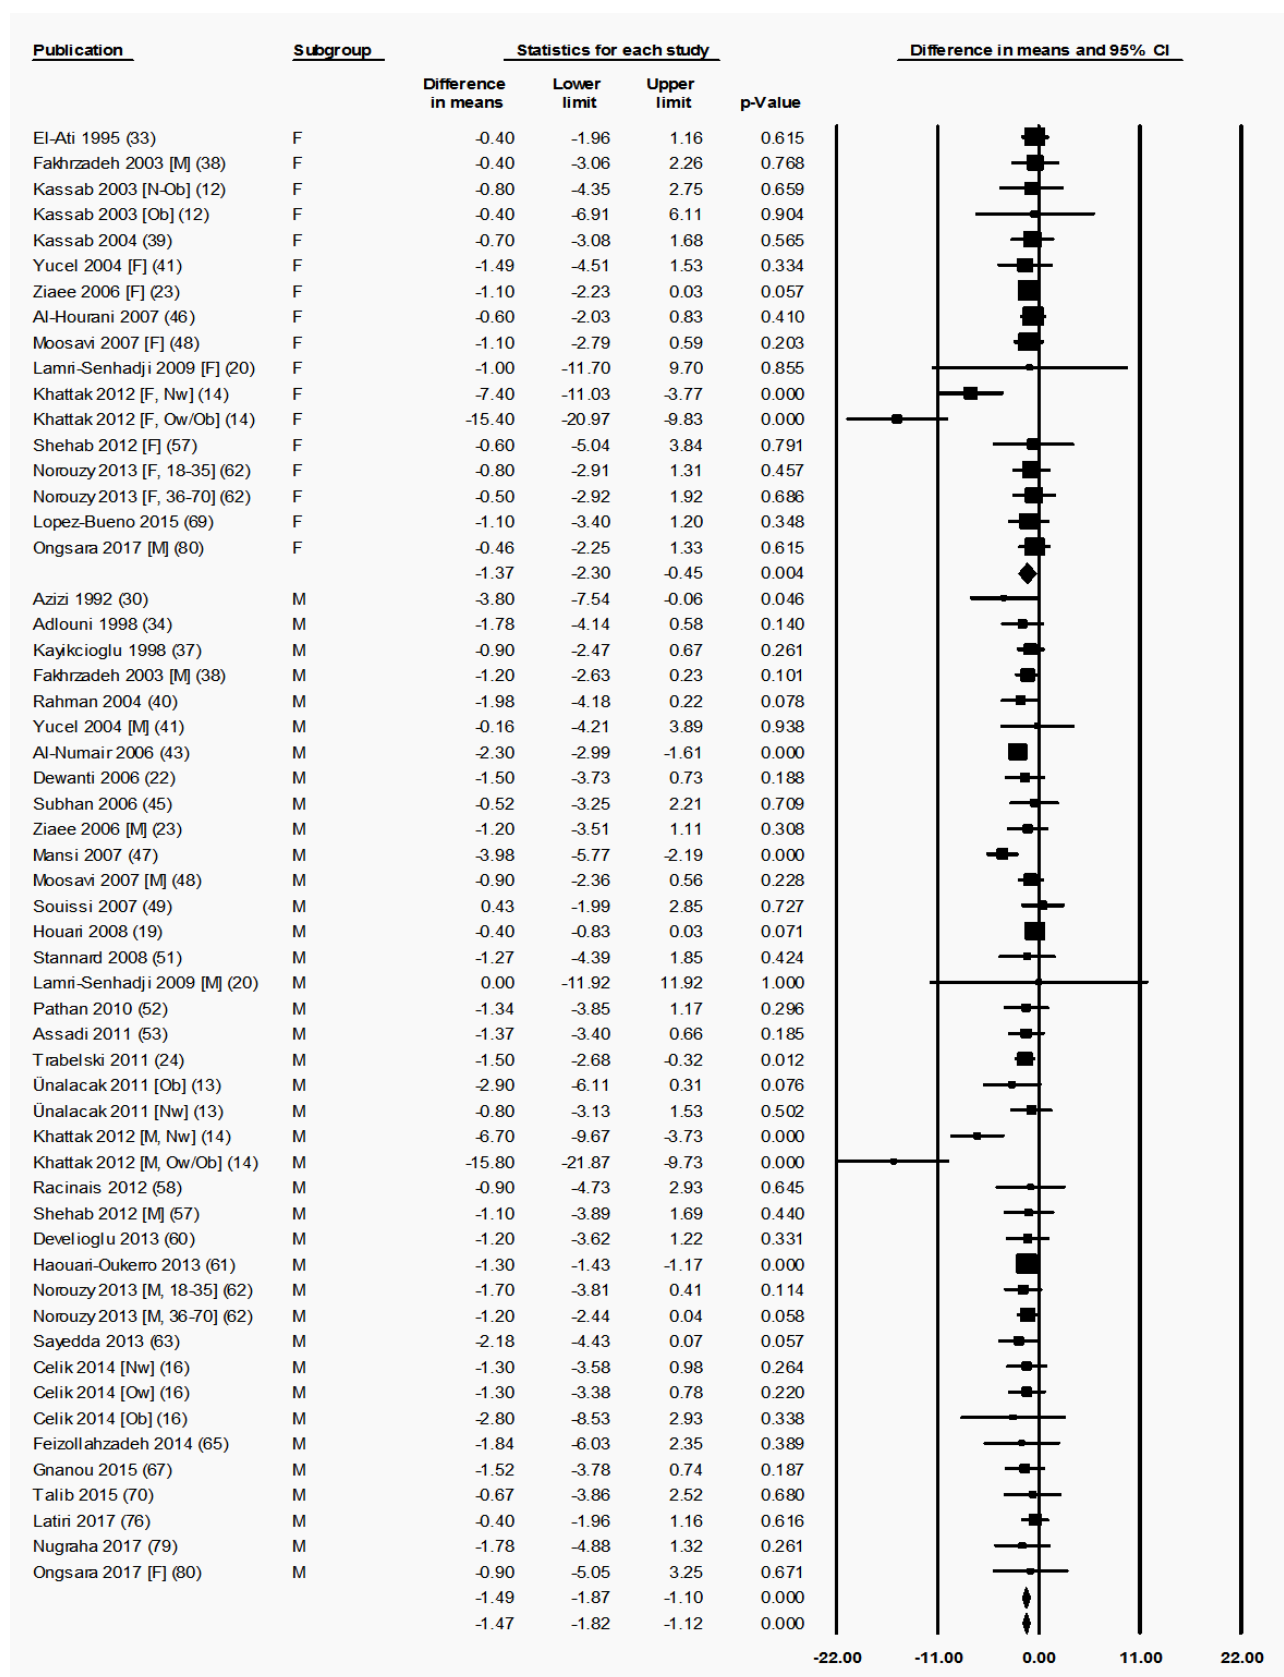

**Figure S6.** Weight was significantly decreased by Ramadan fasting in both the female and the male subgroup. Change in weight (kg) as subdivided by sex (female and male), between pre-Ramadan (pre-R) and end of Ramadan (post-R). There was no significant difference between female and male subgroups ( $p = 0.829$ ). Heterogeneity statistics: female  $T = 1.376$ ,  $p = 0.001$ ,  $I^2 = 59.5\%$ ; male  $T = 0.628$ ,  $p = < 0.001$ ,  $I^2 = 50.8\%$ . F = female; M = male; Nw = normal weight; Ow = overweight; Ob = obese; N-Ob = non-obese; 18-35, 36-70 = age range in years.

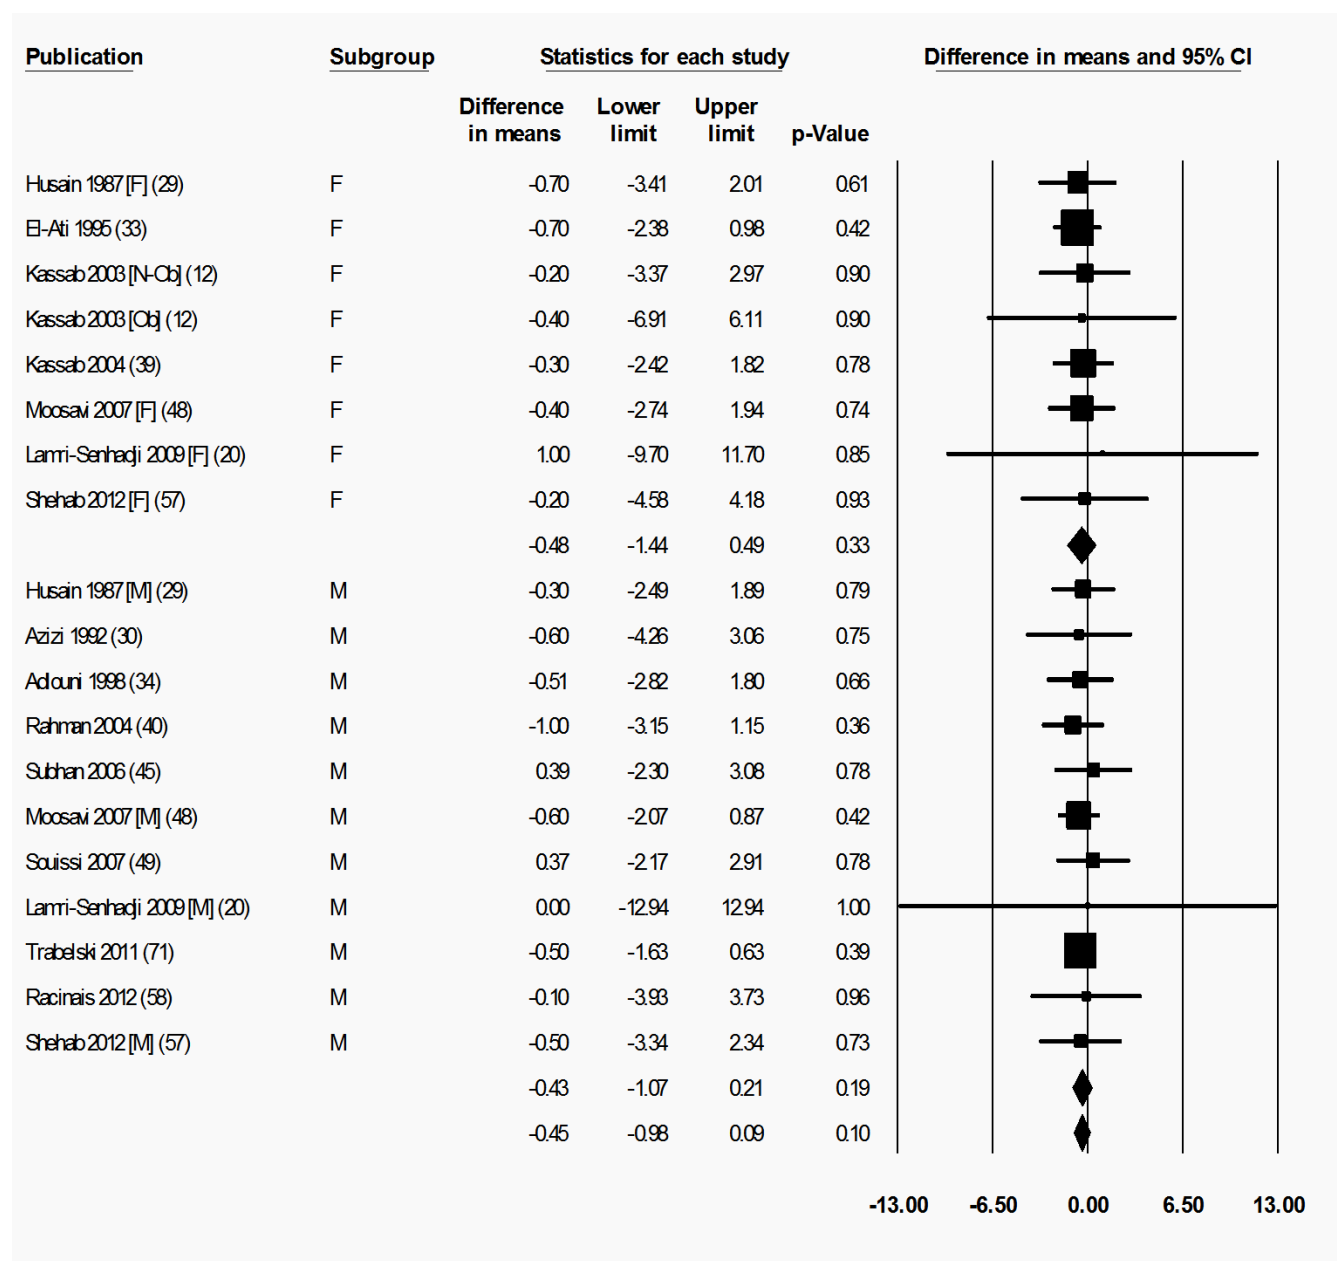

**Figure S7.** Weight was not significantly reduced at 2-5 weeks after Ramadan in the female or the male subgroup. Change in weight (kg) as subdivided by sex (female and male), between pre-Ramadan (pre-R) and 2-5 weeks after Ramadan (follow-up). There was no significant difference between female and male subgroups ( $p = 0.940$ ). Heterogeneity statistics: female  $T = 0.000$ ,  $p = 1.000$ ,  $I^2 = 0.0\%$ ; male  $T = 0.000$ ,  $p = 1.000$ ,  $I^2 = 0.0\%$ . F = female; M = male; Ob = obese; N-Ob = non-obese.

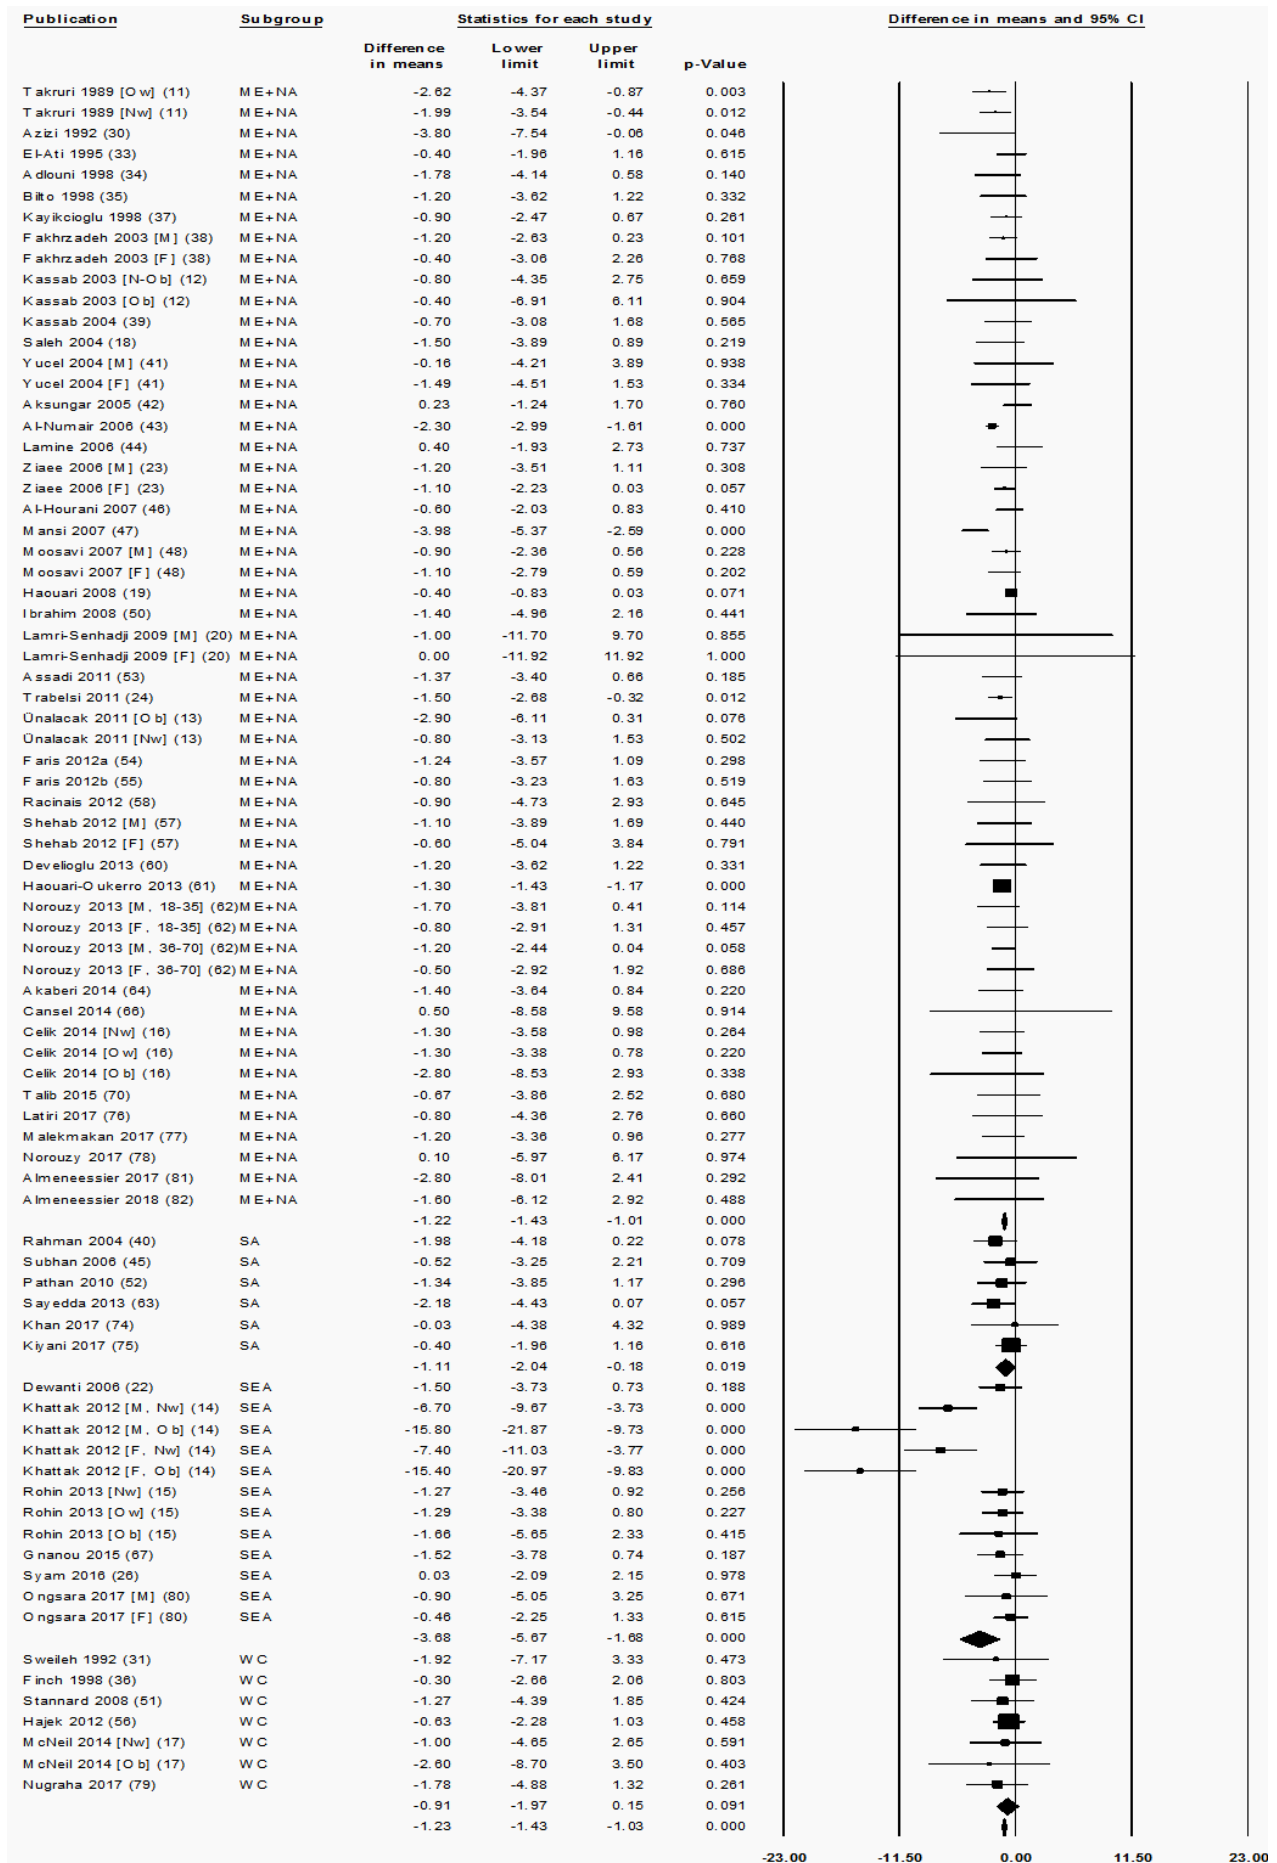

**Figure S8.** Weight was significantly decreased by Ramadan fasting in the the Middle East + North Africa, South Asia, and South East Asia, but not in the Westernized countries subgroup. Change in weight (kg) as subdivided by location category (Middle East + North Africa, South Asia, South East Asia, and Westernized countries), between pre-Ramadan (pre-R) and the end of Ramadan (post-R). There was no significant difference between subgroups ( $p = 0.069$ ). Heterogeneity statistics: Middle East + North Africa  $T = 0.185$ ,  $p = 0.322$ ,  $I^2 = 7.4\%$ ; South Asia  $T = 0.000$ ,  $p = 0.744$ ,  $I^2 = 0.0\%$ ; South East Asia  $T = 9.667$ ,  $p = < 0.001$ ,  $I^2 = 83.8\%$ ; Westernized countries  $T = 0.000$ ,  $p = 0.979$ ,  $I^2 = 0.0\%$ . F = female; M = male; Nw = normal weight; Ow = overweight; Ob = obese; N-Ob = non-obese; 18-35, 36-70 = age range in years; ME + NA = Middle East + North Africa; SA = South Asia; SEA = South East Asia; WC = westernized countries.

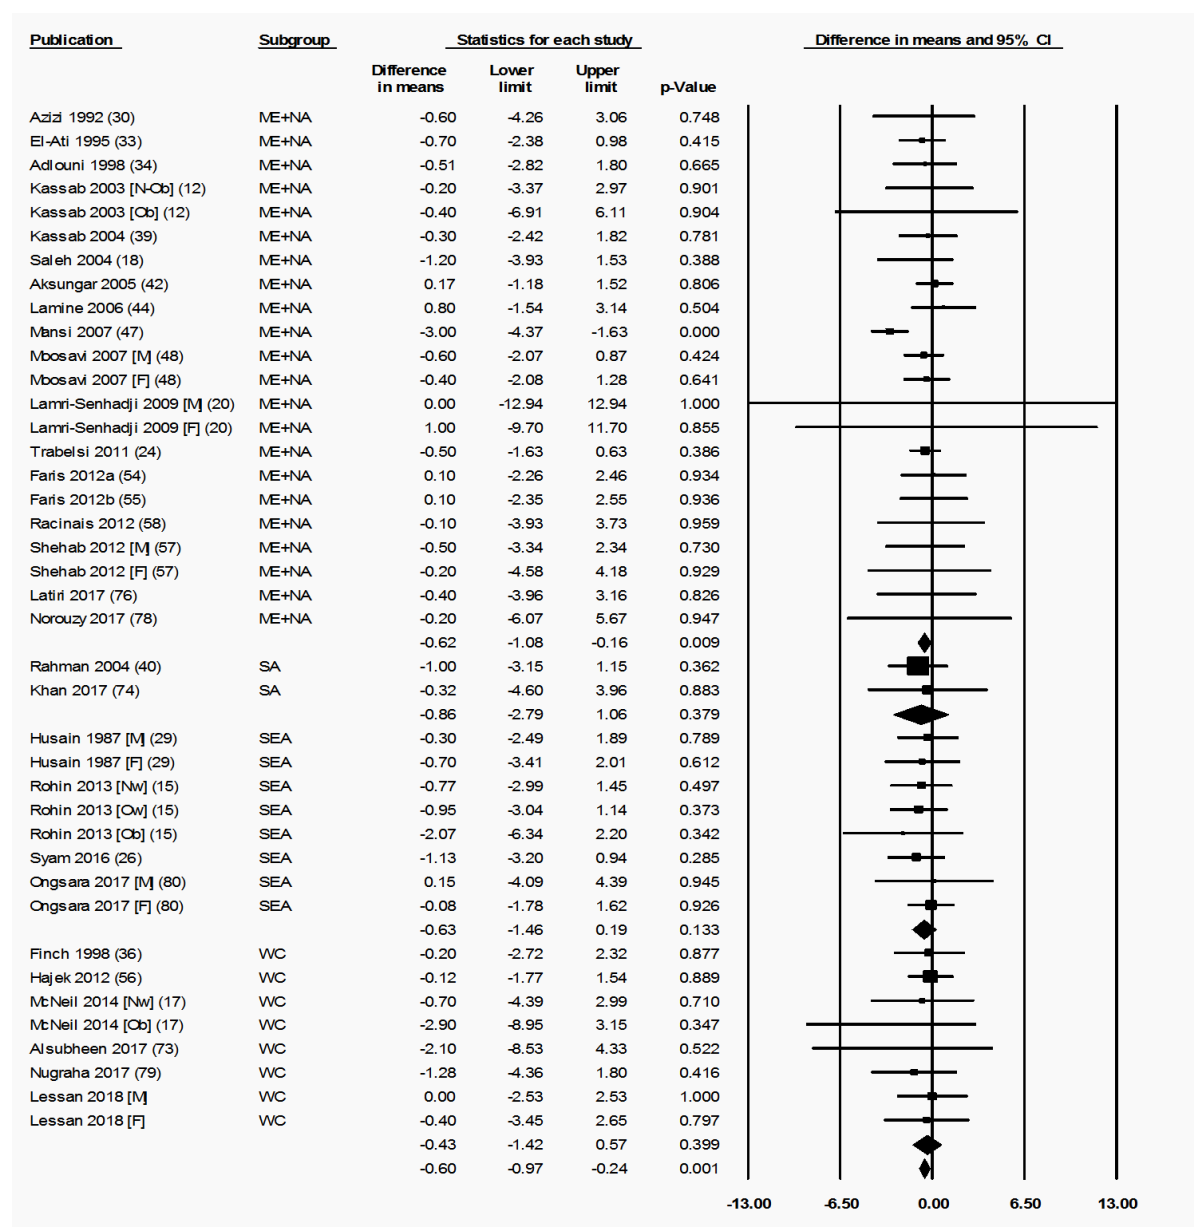

**Figure S9.** Weight was not significantly reduced at 2-5 weeks after Ramadan only in the Middle East + North Africa but not in any other subgroup. Change in weight (kg) as subdivided by location category (Middle East + North Africa, South Asia, South East Asia and Westernized countries), between pre-Ramadan (pre-R) and 2-5 weeks after Ramadan (follow-up). Heterogeneity statistics: Middle East + North Africa  $T = 0.000$ ,  $p = 0.785$ ,  $I^2 = 0.0\%$ ; South Asia  $T = 0.000$ ,  $p = 0.781$ ,  $I^2 = 0.0\%$ ; South East Asia  $T = 0.000$ ,  $p = 0.986$ ,  $I^2 = 0.0\%$ ; Westernized countries  $T = 0.000$ ,  $p = 0.983$ ,  $I^2 = 0.0\%$ . F = female; M = male; Nw = normal weight; Ow = overweight; Ob = obese; N-Ob = non-obese; ME + NA = Middle East + North Africa; SA = South Asia; SEA = South East Asia; WC = westernized countries.

(a)

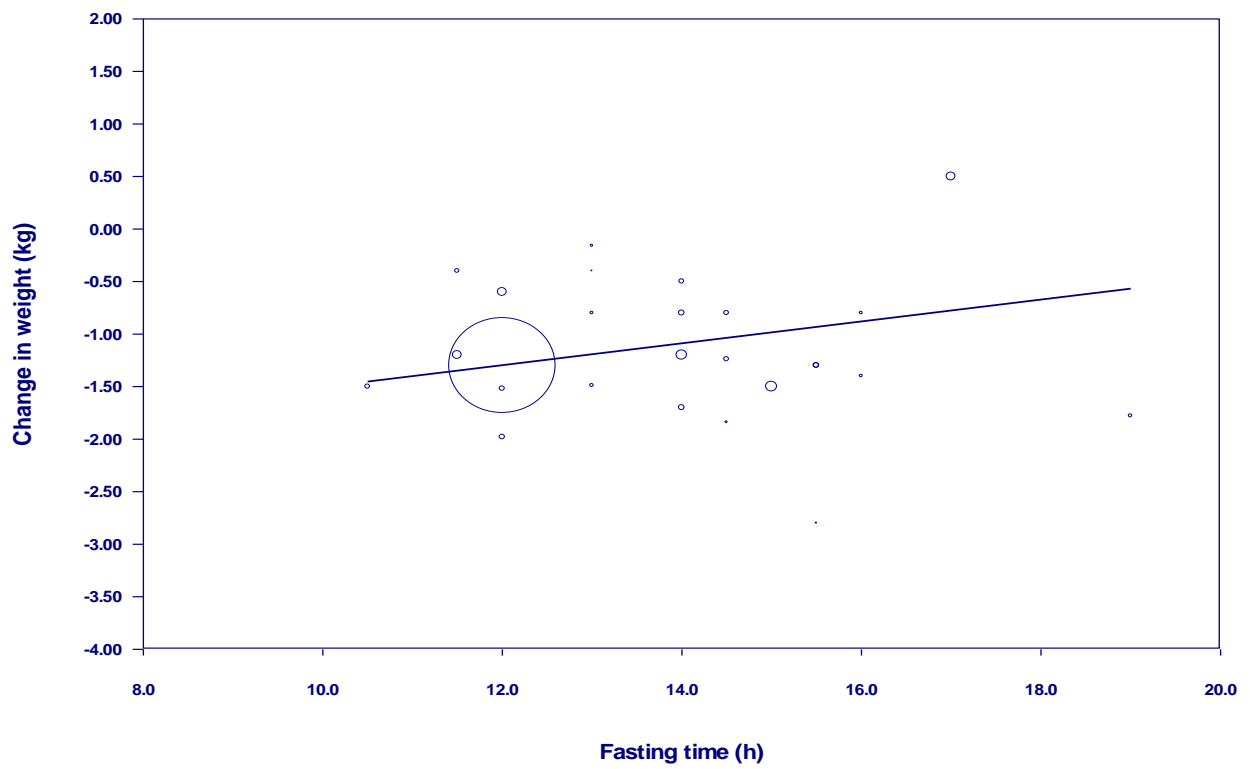

(b)

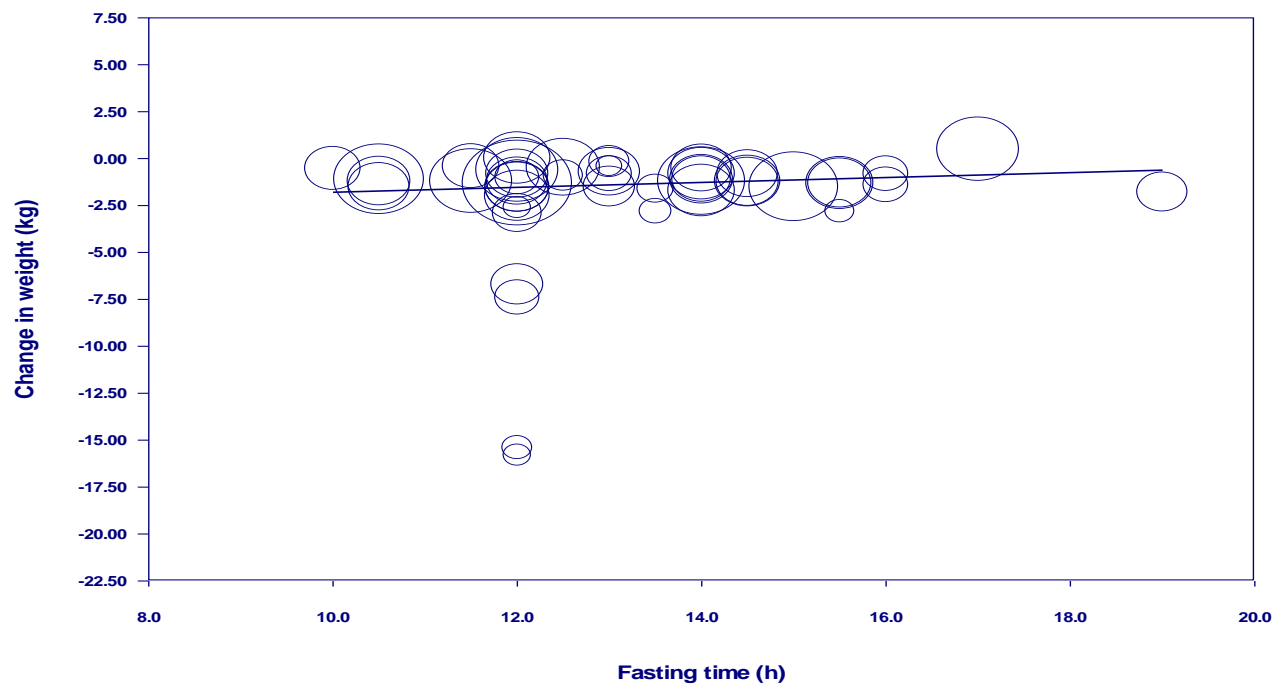

**Figure S10.** There was no significant correlation between fasting time and mean weight change, either when using only published mean fasting times (a), or when using both published and inferred mean fasting times (b). Scatterplot of the meta-regression analysis for the correlation between fasting time and weight change from pre-Ramadan (pre-R) to the end of Ramadan (post-R) for each of the 42 (a) or 75 (b) comparison groups from publications that obtained both fasting time and weight data at these two time points (pre-R and post-R). The area of each circle represents the percentage weight contributed by each study to the overall meta-regression, with larger circles representing greater weight contributions. The correlation was not statistically significant for either meta-regression ( $p = 0.226$  and  $p = 0.794$  for (a) and (b), respectively). Heterogeneity statistics:  $T = 0.143$ ,  $p = 0.395$ ,  $I^2 = 4.2\%$  and  $T = 0.693$ ,  $p < 0.001$ ,  $I^2 = 46.5\%$  for (a) and (b) respectively.

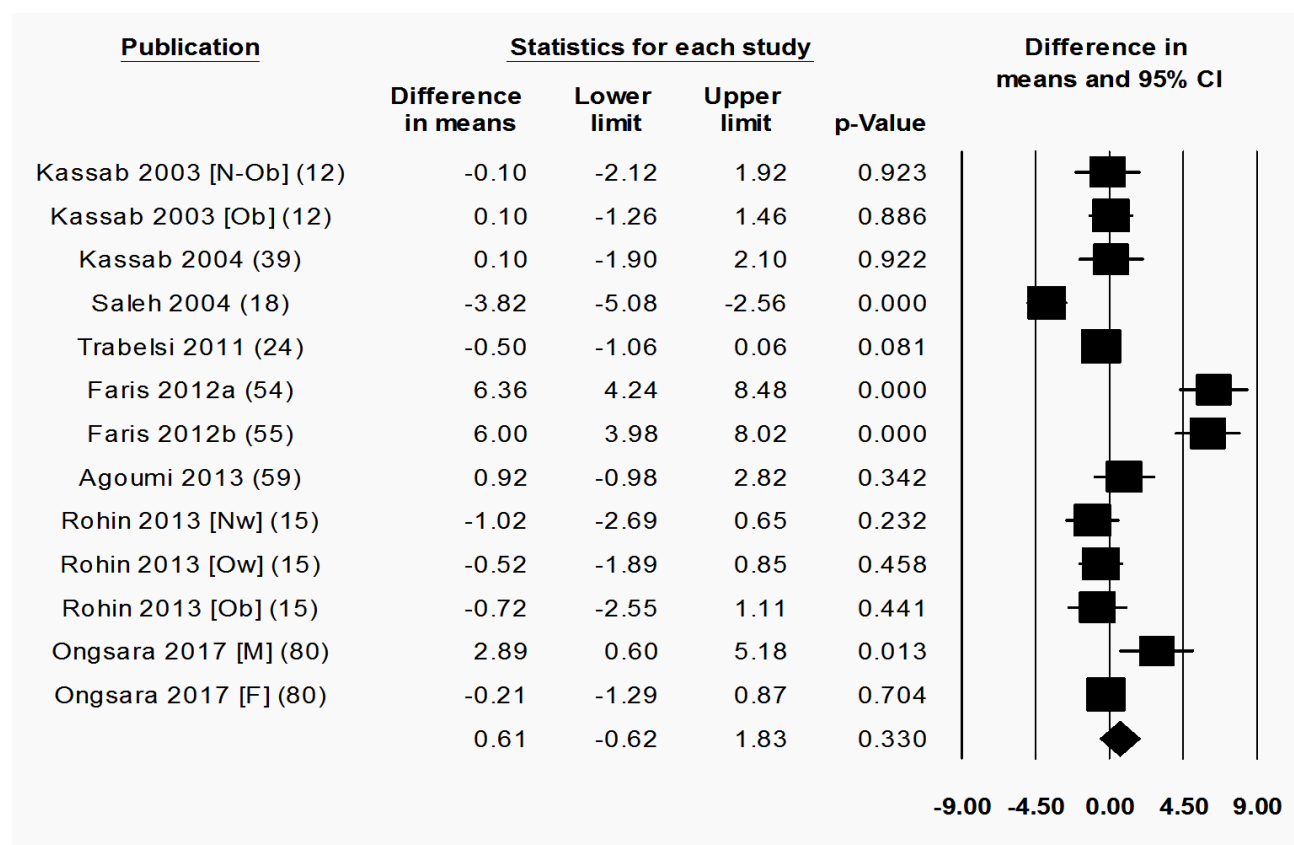

**Figure S11.** Fat percentage was not significantly reduced at 2-5 weeks after Ramadan fasting. Change in fat percentage (%) between pre-Ramadan (pre-R) and 2-5 weeks after Ramadan (follow-up). Heterogeneity statistics:  $T = 2.083$ ,  $p < 0.001$ ,  $I^2 = 89.7\%$ . F = female; M = male; Nw = normal weight; Ow = overweight; Ob = obese; N-Ob = non-obese.

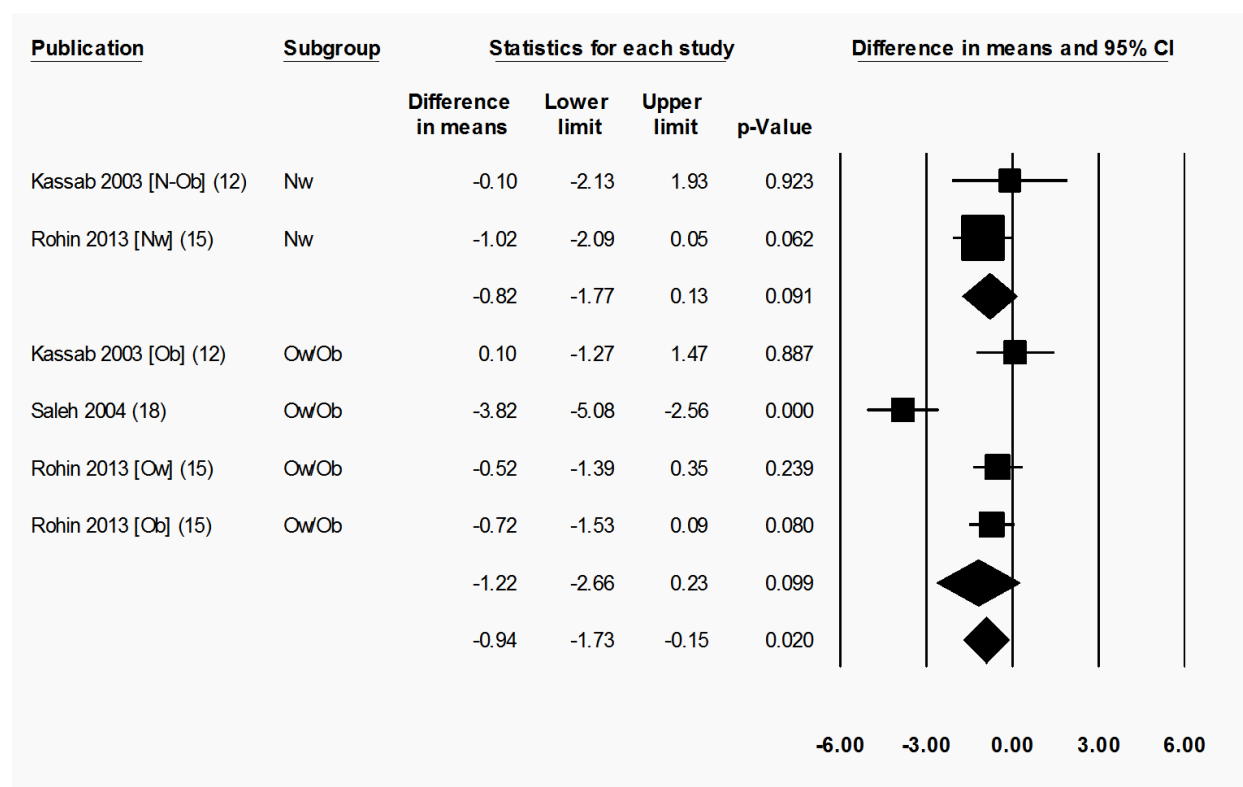

**Figure S12.** Fat percentage was not significantly reduced at 2-5 weeks after Ramadan fasting in the normal weight or the overweight/obese subgroup. Change in fat percentage as subdivided by BMI category (normal weight and overweight/obese), between pre-Ramadan (pre-R) and 2-5 weeks after Ramadan (follow-up). There was no significant difference between normal weight and overweight/obese subgroups ( $p = 0.651$ ). Heterogeneity statistics: normal weight  $T = 0.000$ ,  $p = 0.432$ ,  $I^2 = 0.0\%$ ; overweight/obese  $T = 1.365$ ,  $p < 0.001$ ,  $I^2 = 87.1\%$ . Nw = normal weight; Ow = overweight; Ob = obese.

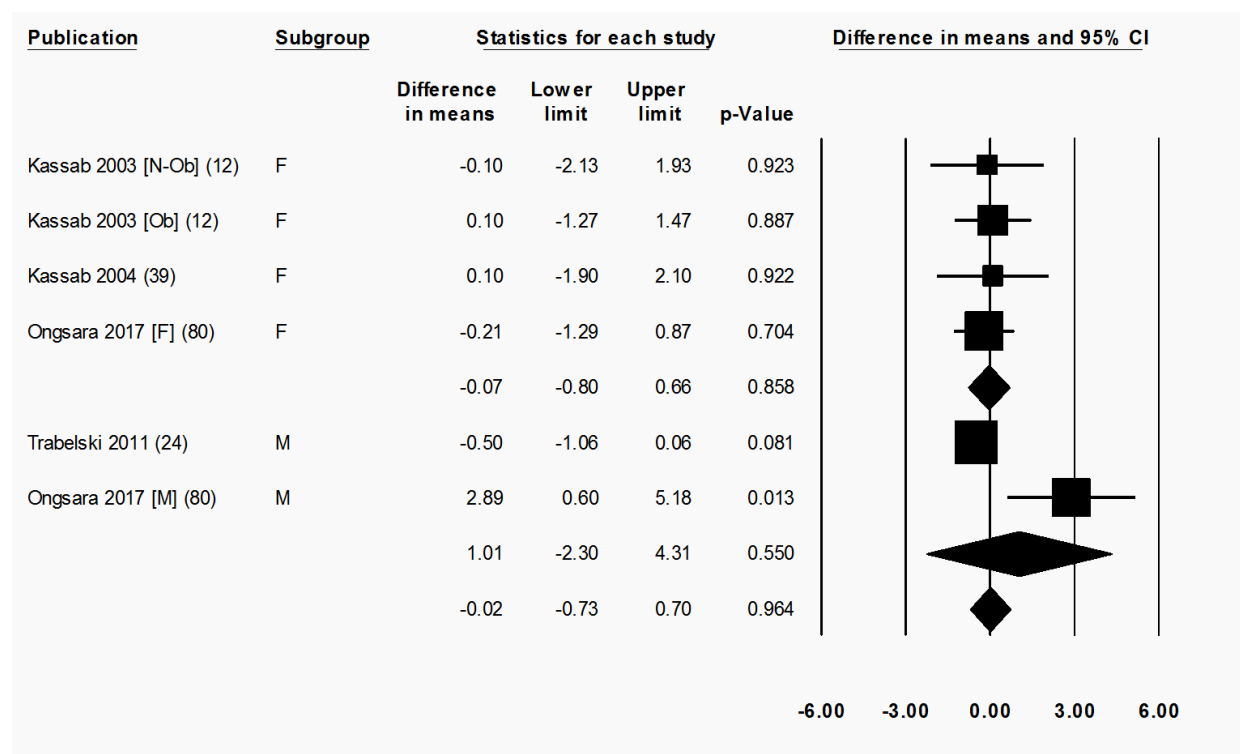

**Figure S13.** Fat percentage was not significantly reduced at 2-5 weeks after Ramadan fasting in the female or the male subgroup. Change in fat percentage as subdivided by sex (female and male), between pre-Ramadan (pre-R) and 2-5 weeks after Ramadan (follow-up). There was no significant difference between female and male subgroups ( $p = 0.534$ ). Heterogeneity statistics: female  $T = 0.000$ ,  $p = 0.985$ ,  $I^2 = 0.0\%$ ; male  $T = 2.242$ ,  $p = 0.005$ ,  $I^2 = 87.5\%$ . F = female; M = male; Ob = obese; N-Ob = non-obese.

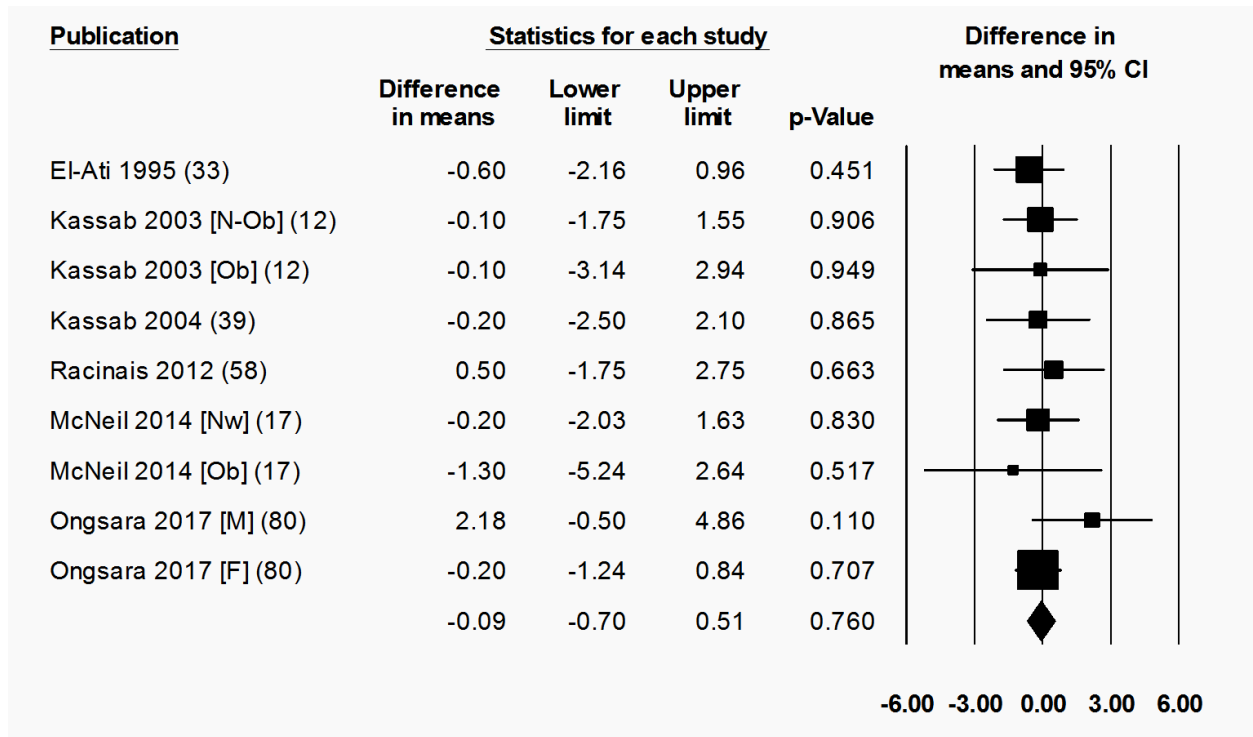

**Figure S14.** Absolute fat mass was not significantly reduced at 2-5 weeks after Ramadan fasting. Change in absolute fat mass (kg) between pre-Ramadan (pre-R) and 2-5 weeks after Ramadan (follow-up). Heterogeneity statistics:  $T = 0.00$ ,  $p = 0.869$ ,  $I^2 = 0.0\%$ . F = female; M = male; Nw = normal weight; Ob = obese; N-Ob = non-obese.

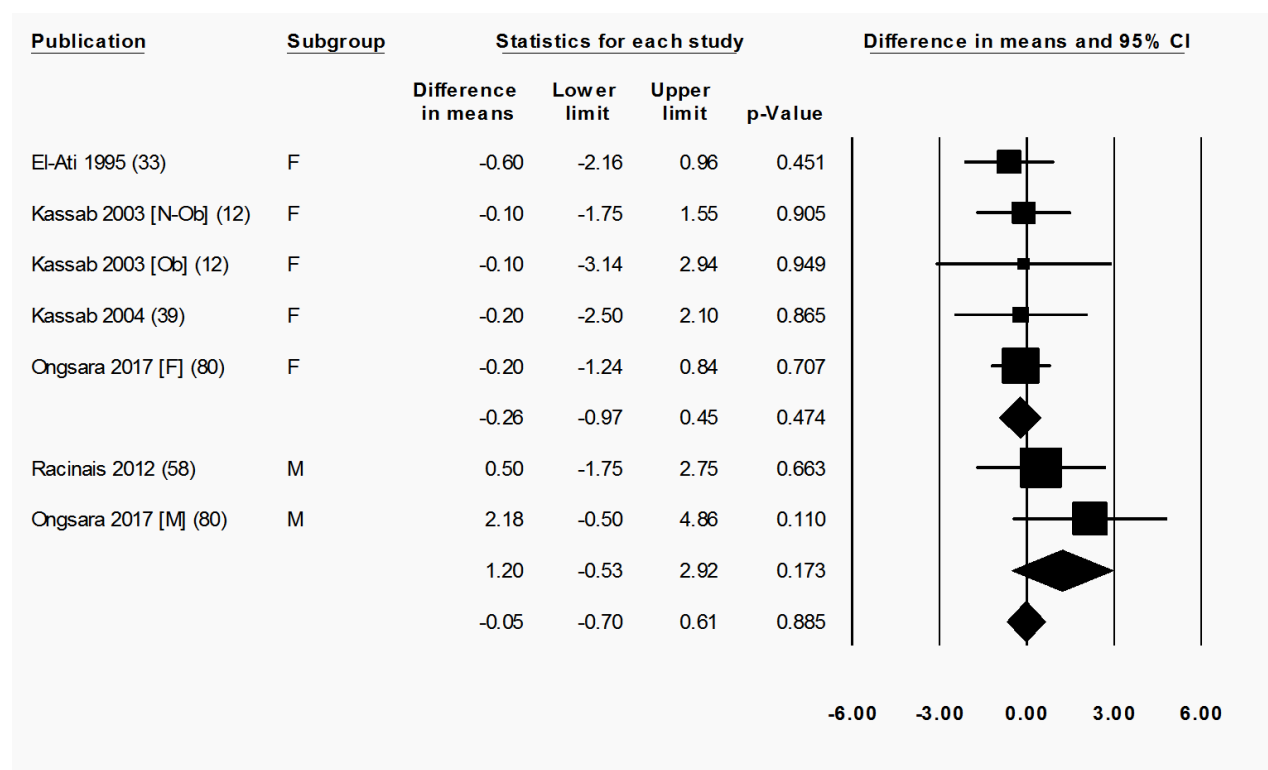

**Figure S15.** Absolute fat mass was not significantly reduced at 2-5 weeks after Ramadan fasting in the female or the male subgroup. Change in absolute fat mass (kg) as subdivided by sex (female and male), between pre-Ramadan (pre-R) and 2-5 weeks after Ramadan (follow-up). There was no significant difference between female and male subgroups ( $p = 0.126$ ). Heterogeneity statistics: female  $T = 0.000$ ,  $p = 0.993$ ,  $I^2 = 0.0\%$ ; male  $T = 0.000$ ,  $p = 0.346$ ,  $I^2 = 0.0\%$ . F = female; M = male; Ob = obese; N-Ob = non-obese.

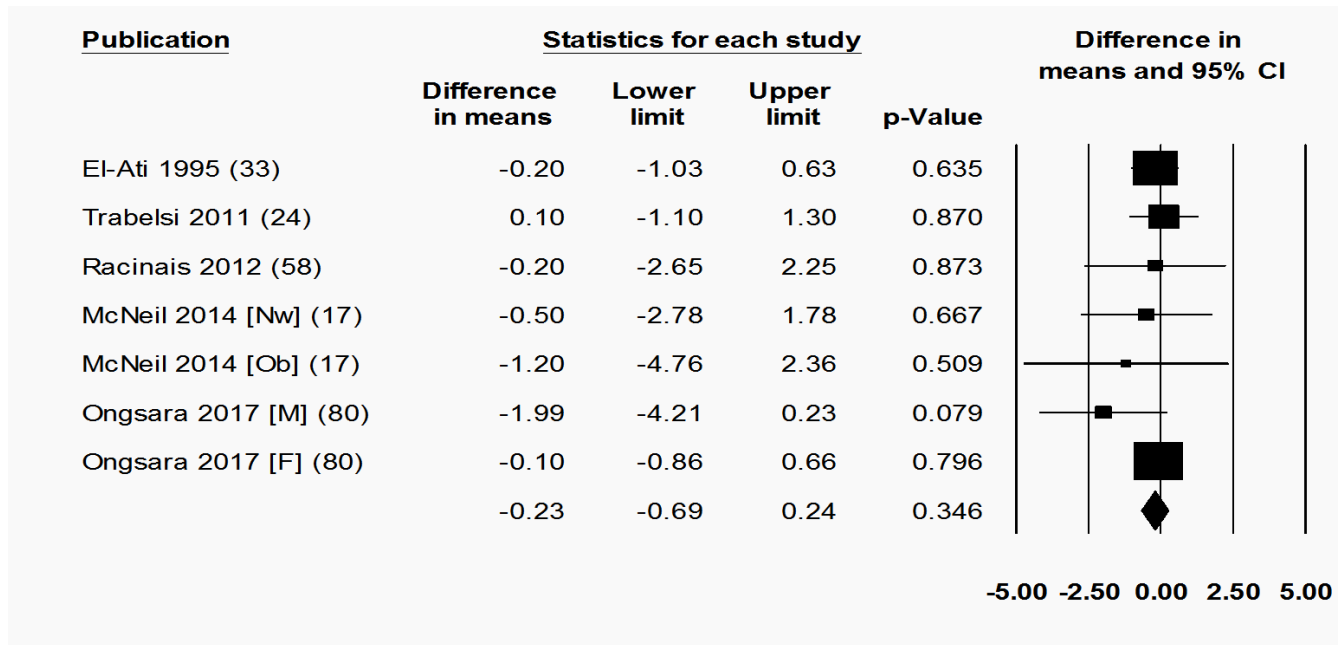

**Figure S16.** Fat-free mass was not significantly reduced at 2-5 weeks after Ramadan fasting. Change in fat-free mass (kg) between pre-Ramadan (pre-R) and 2-5 weeks after Ramadan (follow-up). Heterogeneity statistics:  $T = 0.000$ ,  $p = 0.788$ ,  $I^2 = 0.0\%$ . F = female; M = male; Nw = normal weight; Ob = obese.

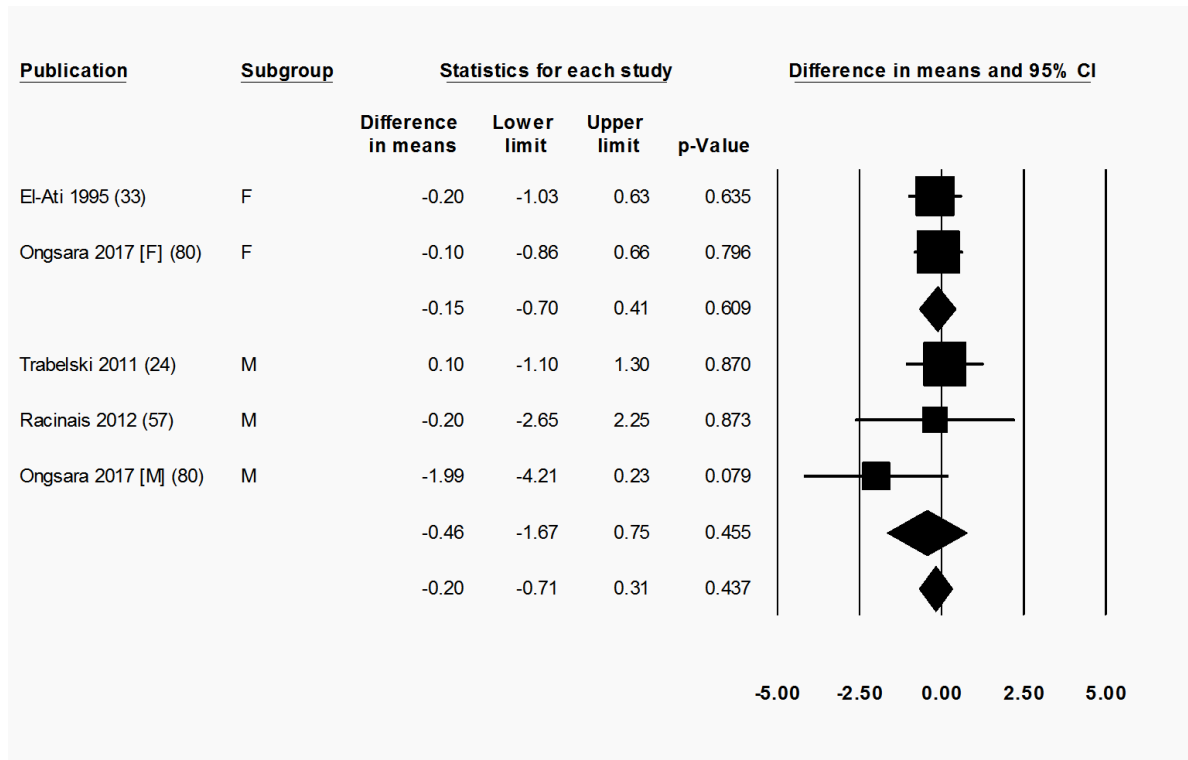

**Figure S17.** Fat-free mass was not significantly reduced at 2-5 weeks after Ramadan fasting in the female or the male subgroup. Change in fat-free mass (kg) as subdivided by sex (female and male), between pre-Ramadan (pre-R) and 2-5 weeks after Ramadan (follow-up). There was no significant difference between female and male subgroups ( $p = 0.126$ ). Heterogeneity statistics: female  $T = 0.000$ ,  $p = 0.861$ ,  $I^2 = 0.0\%$ ; male  $T = 0.265$ ,  $p = 0.265$ ,  $I^2 = 24.7\%$ . F = female; M = male.

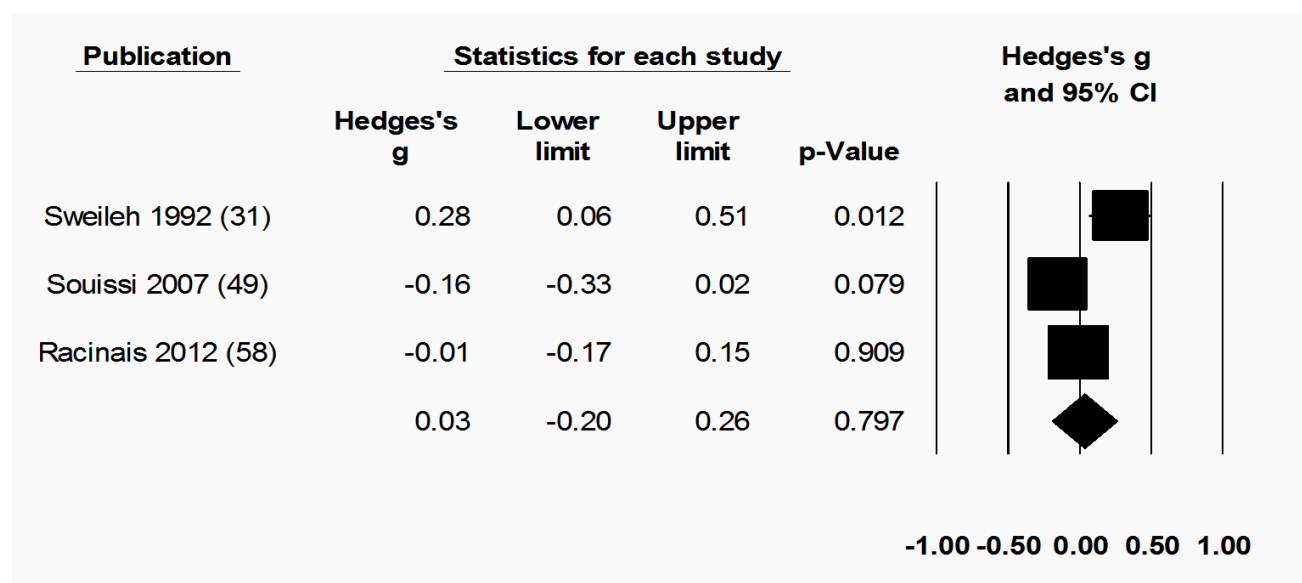

**Figure S18.** Maximum effort physical activity was not significantly changed by Ramadan fasting. Change in maximum effort physical activity (Hedges' g or corrected standardised mean difference) between pre-Ramadan (pre-R) and the end of Ramadan (post-R). Heterogeneity statistics:  $T = 0.179$ ,  $p = 0.009$ ,  $I^2 = 78.7\%$ .

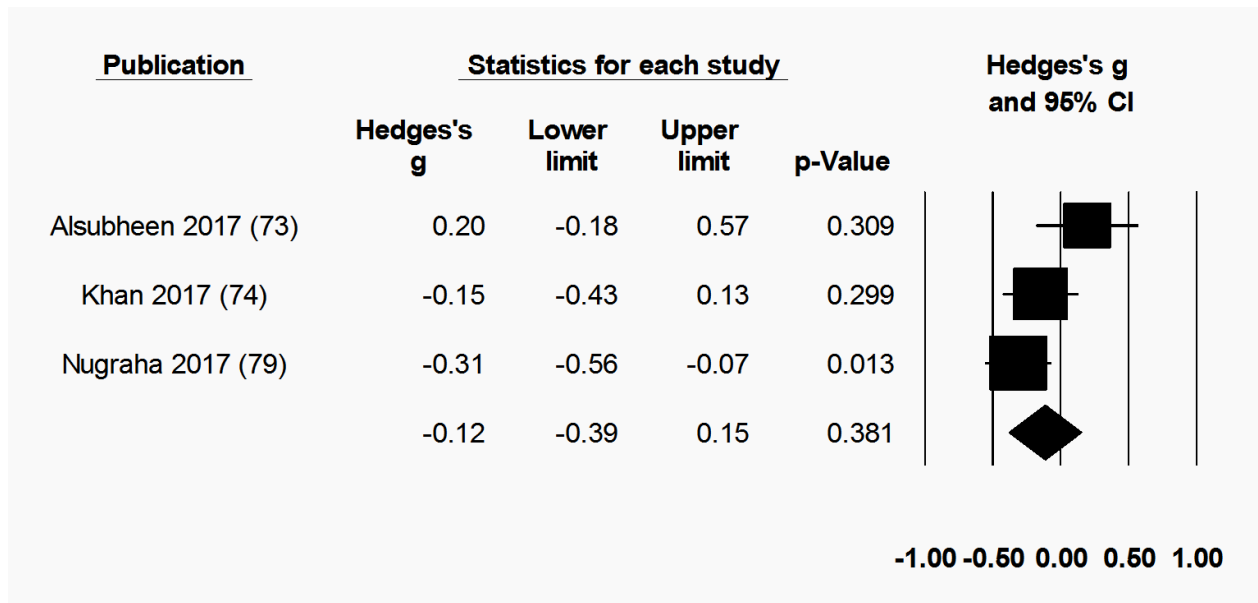

**Figure S19.** Daily physical activity was not significantly changed by Ramadan fasting. Change in daily physical activity (Hedges'  $g$  or corrected standardised mean difference) between pre-Ramadan (pre-R) and the end of Ramadan (post-R). Heterogeneity statistics:  $T = 0.182$ ,  $p = 0.086$ ,  $I^2 = 59.3\%$ .

**Table S2.** PRISMA checklist.

Fernando *et al* 2019 (Supplementary materials)

| Section/topic                      | #  | Checklist item                                                                                                                                                                                                                                                                                              | Reported on page # |
|------------------------------------|----|-------------------------------------------------------------------------------------------------------------------------------------------------------------------------------------------------------------------------------------------------------------------------------------------------------------|--------------------|
| <b>TITLE</b>                       |    |                                                                                                                                                                                                                                                                                                             |                    |
| Title                              | 1  | Identify the report as a systematic review, meta-analysis, or both.                                                                                                                                                                                                                                         | 1                  |
| <b>ABSTRACT</b>                    |    |                                                                                                                                                                                                                                                                                                             |                    |
| Structured summary                 | 2  | Provide a structured summary including, as applicable: background; objectives; data sources; study eligibility criteria, participants, and interventions; study appraisal and synthesis methods; results; limitations; conclusions and implications of key findings; systematic review registration number. | 1                  |
| <b>INTRODUCTION</b>                |    |                                                                                                                                                                                                                                                                                                             |                    |
| Rationale                          | 3  | Describe the rationale for the review in the context of what is already known.                                                                                                                                                                                                                              | 2                  |
| Objectives                         | 4  | Provide an explicit statement of questions being addressed with reference to participants, interventions, comparisons, outcomes, and study design (PICOS).                                                                                                                                                  | 2                  |
| <b>METHODS</b>                     |    |                                                                                                                                                                                                                                                                                                             |                    |
| Protocol and registration          | 5  | Indicate if a review protocol exists, if and where it can be accessed (e.g., Web address), and, if available, provide registration information including registration number.                                                                                                                               | —                  |
| Eligibility criteria               | 6  | Specify study characteristics (e.g., PICOS, length of follow-up) and report characteristics (e.g., years considered, language, publication status) used as criteria for eligibility, giving rationale.                                                                                                      | 2                  |
| Information sources                | 7  | Describe all information sources (e.g., databases with dates of coverage, contact with study authors to identify additional studies) in the search and date last searched.                                                                                                                                  | 2-3                |
| Search                             | 8  | Present full electronic search strategy for at least one database, including any limits used, such that it could be repeated.                                                                                                                                                                               | 2                  |
| Study selection                    | 9  | State the process for selecting studies (i.e., screening, eligibility, included in systematic review, and, if applicable, included in the meta-analysis).                                                                                                                                                   | 2-3                |
| Data collection process            | 10 | Describe method of data extraction from reports (e.g., piloted forms, independently, in duplicate) and any processes for obtaining and confirming data from investigators.                                                                                                                                  | 3                  |
| Data items                         | 11 | List and define all variables for which data were sought (e.g., PICOS, funding sources) and any assumptions and simplifications made.                                                                                                                                                                       | 3                  |
| Risk of bias in individual studies | 12 | Describe methods used for assessing risk of bias of individual studies (including specification of whether this was done at the study or outcome level), and how this information is to be used in any data synthesis.                                                                                      | —                  |
| Summary measures                   | 13 | State the principal summary measures (e.g., risk ratio, difference in means).                                                                                                                                                                                                                               | 4                  |
| Synthesis of results               | 14 | Describe the methods of handling data and combining results of studies, if done, including measures of consistency (e.g., $I^2$ ) for each meta-analysis.                                                                                                                                                   | 4-5                |

| Section/topic                 | #  | Checklist item                                                                                                                                                                                           | Reported on page #        |
|-------------------------------|----|----------------------------------------------------------------------------------------------------------------------------------------------------------------------------------------------------------|---------------------------|
| Risk of bias across studies   | 15 | Specify any assessment of risk of bias that may affect the cumulative evidence (e.g., publication bias, selective reporting within studies).                                                             | 4                         |
| Additional analyses           | 16 | Describe methods of additional analyses (e.g., sensitivity or subgroup analyses, meta-regression), if done, indicating which were pre-specified.                                                         | 4                         |
| <b>RESULTS</b>                |    |                                                                                                                                                                                                          |                           |
| Study selection               | 17 | Give numbers of studies screened, assessed for eligibility, and included in the review, with reasons for exclusions at each stage, ideally with a flow diagram.                                          | 5                         |
| Study characteristics         | 18 | For each study, present characteristics for which data were extracted (e.g., study size, PICOS, follow-up period) and provide the citations.                                                             | Supplementary 2-5         |
| Risk of bias within studies   | 19 | Present data on risk of bias of each study and, if available, any outcome level assessment (see item 12).                                                                                                | –                         |
| Results of individual studies | 20 | For all outcomes considered (benefits or harms), present, for each study: (a) simple summary data for each intervention group (b) effect estimates and confidence intervals, ideally with a forest plot. | 8-14, Supplementary 6-37  |
| Synthesis of results          | 21 | Present results of each meta-analysis done, including confidence intervals and measures of consistency.                                                                                                  | 6-14, Supplementary 14-37 |
| Risk of bias across studies   | 22 | Present results of any assessment of risk of bias across studies (see Item 15).                                                                                                                          | –                         |
| Additional analysis           | 23 | Give results of additional analyses, if done (e.g., sensitivity or subgroup analyses, meta-regression [see Item 16]).                                                                                    | Supplementary 20, 27, 28  |
| <b>DISCUSSION</b>             |    |                                                                                                                                                                                                          |                           |
| Summary of evidence           | 24 | Summarize the main findings including the strength of evidence for each main outcome; consider their relevance to key groups (e.g., healthcare providers, users, and policy makers).                     | 14,15,17                  |
| Limitations                   | 25 | Discuss limitations at study and outcome level (e.g., risk of bias), and at review-level (e.g., incomplete retrieval of identified research, reporting bias).                                            | 17                        |
| Conclusions                   | 26 | Provide a general interpretation of the results in the context of other evidence, and implications for future research.                                                                                  | 15-17                     |
| <b>FUNDING</b>                |    |                                                                                                                                                                                                          |                           |
| Funding                       | 27 | Describe sources of funding for the systematic review and other support (e.g., supply of data); role of funders for the systematic review.                                                               | 18                        |

From: Moher D, Liberati A, Tetzlaff J, Altman DG, The PRISMA Group (2009). Preferred Reporting Items for Systematic Reviews and Meta-Analyses: The PRISMA Statement. PLoS Med 6(7): e1000097. doi:10.1371/journal.pmed1000097 For more information, visit: [www.prisma-statement.org](http://www.prisma-statement.org).
